1 **Cyclooxygenase production of PGE<sub>2</sub> promotes phagocyte control of *A. fumigatus* hyphal**  
2 **growth in larval zebrafish**

3

4

5 **Savini Thrikawala<sup>1</sup>, Mengyao Niu<sup>2</sup>, Nancy P. Keller<sup>2,3</sup>, Emily E. Rosowski<sup>1\*</sup>**

6 <sup>1</sup>Department of Biological Sciences, Clemson University, Clemson, South Carolina, United

7 States of America

8 <sup>2</sup>Department of Medical Microbiology and Immunology, University of Wisconsin-Madison,

9 Madison, Wisconsin, United States of America

10 <sup>3</sup>Department of Bacteriology, University of Wisconsin-Madison, Madison, Wisconsin, United

11 States of America

12

13 \* Corresponding author

14 E-mail: [erosows@clemson.edu](mailto:erosows@clemson.edu)

15

16

17

18

19

20

21

22

23

## 24 **Abstract**

25 Invasive aspergillosis is a common opportunistic infection, causing >50% mortality in infected  
26 immunocompromised patients. The specific molecular mechanisms of the innate immune system  
27 that prevent pathogenesis of invasive aspergillosis in immunocompetent individuals are not fully  
28 understood. Here, we used a zebrafish larva-*Aspergillus* infection model to identify  
29 cyclooxygenase (COX) enzyme signaling as one mechanism that promotes host survival. Larvae  
30 exposed to the pan-COX inhibitor indomethacin succumb to infection at a significantly higher  
31 rate than control larvae. COX signaling is both macrophage- and neutrophil-mediated. However,  
32 indomethacin treatment has no effect on phagocyte recruitment. Instead, COX signaling  
33 promotes phagocyte-mediated inhibition of germination and invasive hyphal growth. Protective  
34 COX-mediated signaling requires the receptor EP2 and exogenous prostaglandin E<sub>2</sub> (PGE<sub>2</sub>)  
35 rescues indomethacin-induced decreased immune control of fungal growth. Collectively, we find  
36 that COX signaling activates the PGE<sub>2</sub>-EP2 pathway to increase control *A. fumigatus* hyphal  
37 growth by phagocytes in zebrafish larvae.

## 38 **Author Summary**

39 Invasive aspergillosis causes mortality in >50% of infected patients. It is caused by a free-living  
40 fungus *Aspergillus fumigatus* which releases thousands of airborne spores. While healthy  
41 individuals clear inhaled spores efficiently, in immunocompromised individuals these spores  
42 grow into filamentous hyphae and destroy lungs and other tissues causing invasive aspergillosis.  
43 The immune mechanisms that control this fungal growth in healthy people are still largely  
44 unknown. Here, we used a larval zebrafish model of *A. fumigatus* infection to determine that  
45 cyclooxygenase enzymes, which are the target of non-steroidal anti-inflammatory drugs such as

46 aspirin and ibuprofen, are important to control the fungus. Innate immune cells use  
47 cyclooxygenase signaling to prevent hyphal growth and tissue destruction. Our study provides  
48 new insights into the mechanisms that immune cells deploy to stop invasive growth of *A.*  
49 *fumigatus* and inform development of future strategies to combat invasive aspergillosis.

## 50 **Introduction**

51 *Aspergillus fumigatus* is a free-living saprophytic fungus which reproduces asexually by  
52 producing thousands of conidia or spores. Owing to their small size and hydrophobicity, spores  
53 become airborne causing widespread contamination both indoors and outdoors. It is estimated  
54 that an average person can inhale 100-1000 spores per day (1). Although healthy immune  
55 systems can combat these spores, in immunocompromised individuals spores can germinate to  
56 form invasive hyphae which spread to multiple organs and tissues—a condition called invasive  
57 aspergillosis (IA) (1). IA remains a major cause of mortality in immunocompromised patients,  
58 particularly individuals with hematological malignancies, bone marrow or solid-organ transplant  
59 recipients, HIV patients, ICU patients, and patients with altered lung conditions (2). Despite the  
60 availability of anti-fungal drugs, the mortality rate of IA remains at ~50% (3-5). Hence, it is  
61 imperative to develop novel strategies to target fungi and augment anti-fungal immune  
62 responses, but this requires a better understanding of immune cell-pathogen interactions. Innate  
63 immune cells act as the first line of defense against inhaled *A. fumigatus* conidia. However, the  
64 signaling and effector mechanisms that these cells use to inhibit fungal growth are not fully  
65 understood.

66  
67 Eicosanoids, such as prostaglandins, are arachidonic acid-derived lipid signaling molecules that  
68 function in both an autocrine and paracrine manner by binding to their receptors and can have a

69 variety of effects on immune cell function (6, 7). Prostaglandins are produced by prostaglandin  
70 endoperoxide H synthases (PGHSs), also called cyclooxygenase (COX) enzymes. COX enzymes  
71 are the target of non-steroidal anti-inflammatory drugs such as aspirin, ibuprofen and  
72 indomethacin (8-10). COX-derived prostaglandins can have either pro- or anti-inflammatory  
73 effects on innate immune cells, modulating both phagocyte recruitment and phagocyte functions  
74 (6, 7, 11). In response to fungal pathogens, prostaglandin signaling is known to inhibit  
75 phagocytosis of *Candida albicans* by macrophages, H<sub>2</sub>O<sub>2</sub>-mediated fungicidal activity against  
76 *Paracoccidioides brasiliensis*, and M1 polarization of alveolar macrophages and killing of  
77 *Cryptococcus neoformans* (12-14). However, the roles of COX activation and prostaglandins  
78 during *A. fumigatus* infections are not known.

79  
80 Analyzing how given pathways affect specific aspects of dynamic host-pathogen interactions *in*  
81 *vivo* is challenging. The zebrafish larva-*Aspergillus* infection model overcomes many of these  
82 challenges, as larvae are transparent and allow for direct visualization of phagocyte-*Aspergillus*  
83 interactions through high-resolution repetitive imaging of the same larvae over the course of a  
84 multi-day infection (15). Multiple steps in pathogenesis such as phagocyte recruitment,  
85 phagocytosis, spore killing, germination, and hyphal growth or clearance can be quantified using  
86 this live imaging technique (16). Zebrafish have a well-conserved immune system with humans,  
87 but depend solely on their innate immune system for the first few weeks of their life, providing a  
88 window to study innate immune mechanisms with no interference from the adaptive system (17,  
89 18). The zebrafish larva-*Aspergillus* model recapitulates multiple aspects of human IA: while  
90 immunocompetent larvae are resistant, immunocompromised larvae are susceptible to the  
91 infection and develop invasive hyphae (19, 20).

92

93 Here we use this zebrafish larva-*Aspergillus* infection model to determine the role of the host  
94 COX pathway in phagocyte-mediated *A. fumigatus* clearance. We find inhibition of host COX  
95 signaling increases spore germination and invasive growth of hyphae in infected larvae, thereby  
96 decreasing host survival. COX signaling does not affect macrophage or neutrophil recruitment  
97 but instead activates these cells to target the fungus. Exogenous PGE<sub>2</sub> injection restores control  
98 of hyphae in COX-inhibited larvae, suggesting that PGE<sub>2</sub> is a major driver of COX-mediated  
99 control of fungal growth by phagocytes.

100

## 101 **Results**

### 102 **Host cyclooxygenase inhibition decreases infected larval survival**

103 Prostaglandins are lipid signaling molecules whose production is induced during inflammation  
104 via cyclooxygenase (COX) enzymes. We used the zebrafish larva-*Aspergillus* infection model to  
105 test the hypothesis that host COX signaling promotes larval survival and fungal clearance in an  
106 *A. fumigatus* infection. Wild-type *A. fumigatus* spores were microinjected into the hindbrain  
107 ventricle of 2 days post fertilization (dpf) larvae. Infected larvae were then exposed to the pan-  
108 COX inhibitor indomethacin or DMSO vehicle control immediately after injection and larval  
109 survival was monitored for 7 days. Indomethacin is a well-established non-steroidal anti-  
110 inflammatory drug that inhibits COX enzyme activation and prostaglandin synthesis (9, 10) and  
111 is widely used in a variety of animal models including zebrafish (21, 22). Indomethacin-treated  
112 larvae succumb to infection at a significantly greater rate than control larvae (Fig 1A). Treatment  
113 with the COX1 inhibitor SC560 (23) or COX2 inhibitor meloxicam (21) also significantly

114 increases infected larval mortality (S1 Fig). With each of these inhibitors, no significant decrease  
115 in survival was observed in mock-infected larvae (Fig 1A and S1 Fig).

116

117 *A. fumigatus* also harbors three Ppo enzymes (PpoA, PpoB and PpoC) with high identity to  
118 vertebrate COX (24), but a previous study reported that indomethacin does not affect the  
119 function of these enzymes (25). To confirm that the observed effects of indomethacin on infected  
120 larval survival are not due to inhibition of fungal enzymes, we infected zebrafish larvae with *A.*  
121 *fumigatus* spores lacking all three *ppo* genes ( $\Delta ppoA$ ,  $\Delta ppoB$ ,  $\Delta ppoC$ ) (S2 Fig). Deletion of *ppo*  
122 enzymes had no effect on fungal virulence, as survival of larvae infected with triple-*ppo*-mutant  
123 *A. fumigatus* spores is similar to larvae infected with wild-type spores (Fig 1B). Additionally,  
124 indomethacin treatment decreased survival equally in larvae infected with triple-*ppo*-mutant and  
125 wild-type spores (Fig 1B). These data demonstrate that indomethacin inhibits host enzymes to  
126 compromise survival of *A. fumigatus*-infected larvae. Since no survival difference was observed  
127 in larvae infected with a triple-*ppo*-mutant, we focused on wild-type *A. fumigatus* for the  
128 remainder of the study.

129

130 Among COX-biosynthesized prostaglandins, prostaglandin E<sub>2</sub> (PGE<sub>2</sub>) is a major product  
131 synthesized by phagocytes that moderates a range of inflammatory processes and has pro- or  
132 anti-inflammatory functions, depending on the receptor to which it binds (26). PGE<sub>2</sub> elicits its  
133 actions via four different E type prostanoid receptors, EP1-4, with most immunomodulatory  
134 effects mediated via EP2 and EP4 (26). Therefore, we tested if EP2 and 4 receptor antagonists  
135 affect the disease outcome of *A. fumigatus*-infected larvae. We used antagonists of EP2: AH6809  
136 (27) and EP4: AH23848 (22, 27, 28) previously used in zebrafish larvae. Larvae exposed to

137 AH6809 succumb to the infection at a similar rate as indomethacin-exposed larvae, both with a  
138 hazard ratio of 3 compared to control larvae, while AH23848-exposed larvae show no significant  
139 difference in survival compared to control (Fig 1C). These data suggest that COX signaling  
140 promotes *A. fumigatus*-infected larvae survival via a PGE<sub>2</sub>-EP2 signaling pathway.

141

142

### 143 **Both macrophages and neutrophils use cyclooxygenase signaling to** 144 **combat *A. fumigatus* infection**

145 We next sought to determine which innate immune cells utilize COX signaling to fight *A.*  
146 *fumigatus* infection. Macrophages and neutrophils are the primary immune cells that combat *A.*  
147 *fumigatus* infection in zebrafish larvae (20). To determine if these cell types play a role in COX-  
148 mediated host responses, we inhibited development of both phagocytes by knocking down *pu.1*  
149 (*spilb*) via morpholino injection (29). If COX signaling activates phagocytes to clear the  
150 infection, we expect that indomethacin treatment of larvae that are already depleted of  
151 phagocytes would have no effect on larval survival. Larvae were injected with *A. fumigatus*  
152 spores or PBS and exposed to indomethacin or DMSO. Indomethacin exposure significantly  
153 decreases survival of larvae injected with a control morpholino but has no effect on *pu.1*  
154 morphants (Fig 2A, S3A Fig), suggesting that COX-mediated host protection is phagocyte-  
155 dependent.

156

157 Then we interfered with macrophage and neutrophil function individually to determine if each  
158 cell type is required for COX-mediated host protection. We injected 1 dpf larvae with clodronate  
159 liposomes to deplete macrophages or PBS liposomes as a control. As observed previously,

160 macrophage-depleted larvae rapidly succumb to the infection (20). However, indomethacin  
161 exposure further decreases the survival of macrophage-depleted larvae (Fig 2B). While  
162 indomethacin treatment makes control larvae 8.4 times more likely to succumb to infection,  
163 clodronate liposome-injected larvae are only 1.7 times more likely to succumb upon  
164 indomethacin treatment (Fig 2B), suggesting that macrophages partially mediate the host-  
165 protective effects of COX signaling, but that even in the absence of macrophages COX signaling  
166 increases host survival. Larvae injected with clodronate liposomes and then given a PBS mock  
167 infection also have lower survival upon indomethacin treatment, suggesting that some of this  
168 death may be due to the effects of the clodronate alone, although this difference in PBS mock-  
169 infected larvae is not statistically significant (S3B Fig).

170

171 We next tested the survival of neutrophil-defective (*mpx:rac2D57N*) infected larvae. In these  
172 larvae neutrophils are unable to migrate to the infection site (30). As found previously,  
173 neutrophil-defective larvae are more susceptible to *A. fumigatus* infection than wild-type controls  
174 (Fig 2C) (20, 31). Indomethacin exposure further decreases survival of neutrophil-defective  
175 larvae (Fig 2C). Compared to wild-type larvae which are 3.9 times more likely to succumb to  
176 infection, neutrophil-defective larvae are only 1.8 times more likely to succumb to infection,  
177 suggesting that neutrophils also partially mediate the host-protective effects of COX signaling,  
178 but that other cell types can be involved. Lack of neutrophils has no effect on survival of mock-  
179 infected larvae treated with indomethacin (S3C Fig). Together, these data demonstrate that both  
180 macrophages and neutrophils participate in COX-mediated responses to promote survival of *A.*  
181 *fumigatus*-infected zebrafish larvae.

182



## 183 **Cyclooxygenase activity is not required for phagocyte recruitment**

184 We next sought to define how the innate immune response is altered by COX inhibition. COX-  
185 synthesized prostaglandins are chemical messengers that can function to recruit immune cells to  
186 infection sites, and we wondered whether COX inhibition affects macrophage or neutrophil  
187 recruitment to *A. fumigatus* infection (7, 20). Zebrafish larvae expressing GFP in macrophages  
188 (*Tg(mpeg1:H2B-GFP)*) or BFP in neutrophils (*Tg(lyz:BFP)*) were infected with *A. fumigatus*  
189 spores expressing mCherry, and treated with indomethacin or DMSO vehicle control and we  
190 enumerated the number of macrophages and neutrophils at the infection site through daily  
191 confocal imaging (Fig 3A).

192

193 As described previously, macrophages are recruited starting at 1 day post infection (dpi) and  
194 form clusters around spores starting at 2-3 dpi (Fig 3B), with neutrophils primarily responding  
195 after spores germinate (Fig 3C). The number of recruited macrophages (Fig 3D), macrophage  
196 cluster area (Fig 3E), and the number of recruited neutrophils (Fig 3F) are not significantly  
197 different between indomethacin- and DMSO-exposed groups at days 1, 2, and 3 post infection.  
198 At 5 dpi, however, more macrophages (Fig 3D) and neutrophils (Fig 3F) are found at the  
199 infection site in indomethacin-treated larvae. Fungal germination occurs at these later time stages  
200 and attracts more immune cells. To control for this variable, we analyzed the number of  
201 macrophages and neutrophils in each larva relative to the day germination and invasive hyphae  
202 were first observed. Using this normalization, we find that macrophage numbers (Fig 3G) and  
203 neutrophil numbers (Fig 3H) are similar between the two conditions at each stage of fungal  
204 pathogenesis. Overall, our results indicate that phagocyte recruitment is not dependent on COX  
205 activation.

## 206 **Cyclooxygenase activity does not promote spore killing**

207 We next hypothesized that the functions of these phagocytes are modulated by COX signaling.  
208 The initial response of macrophages is to phagocytose injected spores and activate spore killing  
209 mechanisms (19, 20). To determine if COX inhibition affects spore killing, we used a live-dead  
210 staining method in which *A. fumigatus* spores expressing YFP are coated with AlexaFluor 546  
211 and injected into zebrafish larvae expressing mTurquoise in macrophages (20, 32). Larvae were  
212 imaged with confocal microscopy at 2 dpi, and we enumerated the number of live versus dead  
213 spores. Live spores are visualized as YFP signal surrounded by AlexaFluor signal, while dead  
214 spores only have AlexaFluor signal (Fig 4A). The percentage of live spores is similar in  
215 indomethacin and DMSO groups both within macrophages and in the whole imaged hindbrain  
216 area (Fig 4B). To confirm these results, we also measured the overall fungal burden in  
217 indomethacin- or DMSO-treated larvae over the 7-day infection period with CFU counts.  
218 Consistent with live-dead staining, the fungal burden is similar between DMSO- and  
219 indomethacin-exposed larvae throughout the infection (Fig 4C), indicating that COX signaling  
220 does not drive spore clearance.

221

## 222 **Cyclooxygenase inhibition decreases immune control of fungal** 223 **germination**

224 As spore killing is not affected by COX inhibition, we next hypothesized that immune control of  
225 the next stages in fungal pathogenesis—spore germination and invasive hyphal growth—is  
226 modulated by COX signaling. To monitor spore germination and hyphal growth in larvae, we  
227 infected larvae with *A. fumigatus* spores expressing mCherry and imaged at 1, 2, 3 and 5 dpi with

228 confocal microscopy. We find spore germination in both indomethacin- and DMSO-exposed  
229 larvae (Fig 5A). However, both the rate at which larvae are observed to have germination inside  
230 of them and the total percentage of larvae that harbor germinated spores is significantly higher in  
231 the presence of indomethacin (Fig 5B).

232

233 Since germination is increased upon indomethacin treatment, we wanted to confirm again that  
234 the effects of indomethacin are on the host and that indomethacin does not directly alter *A.*  
235 *fumigatus* germination. To test this, *A. fumigatus* spores were inoculated *in vitro* in liquid RPMI  
236 medium in the presence of indomethacin or DMSO and the percentage of germinated spores was  
237 scored at 2-hour intervals. We find no difference in the rate of germination between  
238 indomethacin and DMSO-treated spores (S4 Fig). Therefore, our data demonstrate that  
239 indomethacin decreases host immune cell-mediated control of *A. fumigatus* germination.

240

## 241 **Cyclooxygenase inhibition decreases immune control of invasive** 242 **hyphal growth**

243 After germination, *A. fumigatus* hyphae branch and grow into a network disrupting the host  
244 tissue. The cumulative percentage of larvae with invasive hyphae (as defined by branched hyphal  
245 growth (S5 Fig)) is also significantly higher with indomethacin treatment (Fig 5B). We also  
246 quantified the hyphal burden by measuring the fungal area, finding more extensive hyphal  
247 growth in indomethacin-treated larvae at both 3 and 5 dpi, although this difference is not  
248 statistically significant (Fig 5C), likely due to high variability between larvae and the large  
249 number of indomethacin-treated larvae that succumbed to infection before 5 dpi (Fig 1A). Next,  
250 we rated the severity of fungal growth on a scale of 0 to 4, from no germination to severe

251 invasive growth of hyphae, and a lethal score of 5 (S5 Fig). Severe growth of invasive hyphae is  
252 prominent in larvae exposed to indomethacin, eventually causing mortality (Fig 5D). Although  
253 germination occurred in the vehicle control group, these larvae are able to delay invasive growth  
254 compared to indomethacin-treated larvae (Fig 5D), suggesting that the major defect in these  
255 larvae is a failure to control hyphal growth post-germination. To quantify this time of delay  
256 between appearance of germination and invasive hyphae, we analyzed the timeline of first  
257 appearance of germlings and invasive hyphae in larvae more closely, focusing only on larvae  
258 that had germination within them at some point in the experiment. We quantified the day  
259 germination was first observed, the day invasive hyphae was first observed, and the time  
260 between these two occurrences. The day to first observe germination was similar between the  
261 two groups (Fig 5E). However, invasive hyphae appear significantly earlier after both initial  
262 infection (Fig 5F) and after germination (Fig 5G) in indomethacin-exposed larvae. Once spores  
263 are germinated, invasive hyphae appear on average ~1 day later in control larvae, while in  
264 indomethacin-treated larvae, this growth only takes an average of ~0.5 days (Fig 5G). Together,  
265 these results suggest that COX signaling promotes phagocyte-mediated control of invasive  
266 hyphal growth.

267

268 Neutrophils are thought to be the major phagocyte that targets and kills invasive hyphae. In *irf8*<sup>-/-</sup>  
269 larvae which lack macrophages and have an abundance of neutrophils, neutrophils destroy fast-  
270 germinating strains of *A. fumigatus* such as CEA10 within a few days (20). We therefore decided  
271 to use this infection scenario to specifically test the requirement for COX signaling in neutrophil-  
272 mediated hyphal killing. We infected *irf8*<sup>-/-</sup> larvae with CEA10 spores and isolated larvae for  
273 CFU enumeration at 0, 1, and 2 dpi. CFUs from *irf8*<sup>-/-</sup> were normalized to CFUs of *irf8*<sup>+/+</sup>/*irf8*<sup>+/-</sup>

274 at each dpi for each condition. At 2 dpi in DMSO-treated larvae, ~26% of the fungal burden  
275 remains in *irf8*<sup>-/-</sup> larvae compared to macrophage-sufficient larvae (*irf8*<sup>+/+</sup> or *irf8*<sup>+/-</sup>),  
276 demonstrating the neutrophil-mediated clearance of fungus that occurs in these larvae (S6A Fig).  
277 Fungal clearance is slightly alleviated but not significantly different in indomethacin-exposed  
278 *irf8*<sup>-/-</sup> larvae, suggesting that COX signaling may promote but is not required for neutrophil-  
279 mediated killing of hyphae (S6A Fig). Similar to infection with Af293-derived strains, CEA10-  
280 infected larvae also succumb to the infection at a higher rate in the presence of indomethacin  
281 both in *irf8*<sup>+/+ / irf8</sup><sup>+/-</sup> and *irf8*<sup>-/-</sup> backgrounds (S6B Fig).

282

## 283 **Exogenous PGE<sub>2</sub> increases immune control of hyphal growth in the** 284 **presence of indomethacin**

285 So far we have established that COX signaling promotes macrophage- and neutrophil-mediated  
286 control of germination and invasive hyphal growth in an *A. fumigatus* infection. It is likely that  
287 COX signaling acts via a PGE<sub>2</sub>-EP2 signaling axis, as EP2 receptor antagonist-treated infected  
288 larvae succumb to infection at the same rate as indomethacin-treated larvae (Fig. 1C). We  
289 therefore tested if exogenous PGE<sub>2</sub> can rescue the effects of indomethacin treatment in infected  
290 larvae. Since PGE<sub>2</sub> is short-lived and elicits short-range effects, we injected *A. fumigatus*-  
291 infected, indomethacin- or DMSO-treated larvae with PGE<sub>2</sub> or DMSO vehicle control into the  
292 hindbrain at 1 dpi. PGE<sub>2</sub> injection partially rescues survival of indomethacin-treated larvae,  
293 although the effect is not statistically significant (Fig 6A). To determine if PGE<sub>2</sub> can rescue  
294 indomethacin-inhibited functions of phagocytes against invasive fungal growth, we imaged the  
295 larvae at 3 dpi. As seen previously, indomethacin treatment increases the percentage of larvae

296 harboring both germination and invasive hyphae at 3 dpi (Fig 6B). Quantification of 2D fungal  
297 area further supports this observation (Figs 6C, D). PGE<sub>2</sub> supplementation rescues these  
298 phenotypes, decreasing germination, development of invasive hyphae, and total fungal burden  
299 (Figs 6B-D), without affecting phagocyte recruitment (S7A and S7B Figs). However, in the  
300 absence of indomethacin treatment, exogenous PGE<sub>2</sub> actually leads to increased fungal  
301 germination and invasive hyphae (Fig 6B). Additional experiments also demonstrate that PGE<sub>2</sub>  
302 injection does not increase survival of either wild-type or neutrophil-defective larvae not treated  
303 with indomethacin (Fig 6A, S7C Fig). These data suggest that the level of PGE<sub>2</sub> during infection  
304 must be strictly controlled as too much PGE<sub>2</sub> is also detrimental to control of *A. fumigatus*.  
305 Collectively, our findings demonstrate that COX-mediated PGE<sub>2</sub> production and signaling via  
306 the EP2 receptor promotes phagocyte-mediated control of *A. fumigatus* germination and hyphal  
307 growth (Fig 7).

308

## 309 **Discussion**

310 Healthy immune systems can contain and kill *A. fumigatus* spores despite the fact that hundreds  
311 of spores can be inhaled per day. While the physiological role of macrophages and neutrophils in  
312 this context is well-appreciated, the molecular mechanisms that each of these cell types use to  
313 combat each stage of fungal pathogenesis are not fully understood. The critical step in *A.*  
314 *fumigatus* pathogenesis is the transition from dormant spore to hyphal growth, causing tissue  
315 destruction. Here, we used a zebrafish larva-*A. fumigatus* infection model to identify COX-PGE<sub>2</sub>  
316 signaling as one mechanism that promotes control of this transition to invasive hyphae by both  
317 macrophages and neutrophils (Fig 7).

318

319 To investigate the role of COX signaling in phagocyte responses we used indomethacin, a pan-  
320 COX inhibitor, as well as COX1- and COX2-specific inhibitors. We find that activity of both  
321 enzymes promotes survival of *A. fumigatus*-infected larvae. Broadly, COX1 activity is involved  
322 in tissue homeostasis while COX2 is inducible and is involved in responses to inflammatory  
323 stimuli (6). However, evidence suggests that both isoforms are activated during inflammation.  
324 Mice lacking COX1 have impaired inflammatory responses (33), and COX1 is activated in  
325 response to LPS-induced inflammation in humans (34). Zebrafish have one functional isoform of  
326 COX1 and two functional orthologues of COX2: COX2a and COX2b (35). The role of COX1 in  
327 inflammatory responses in zebrafish is not fully understood, and the specificity of the chemical  
328 inhibitors for zebrafish COX2 isoforms are not know. Hence, we cannot conclude if phagocyte-  
329 mediated *A. fumigatus* control is via COX1, COX2a, COX2b, or a combination.

330

331 COX enzymes can produce prostaglandins in multiple cell types including epithelial cells,  
332 endothelial cells and fibroblasts, but infiltrating innate immune cells are the major source of  
333 these lipid signals during inflammation, including both macrophages (36) and neutrophils (11).  
334 In the current study, the source of prostaglandins is unknown. Both macrophages and neutrophils  
335 use COX signaling to combat *A. fumigatus*, however, we cannot rule out an additional role for  
336 other cell types in this signaling. One possibility is that PGE<sub>2</sub> mediates crosstalk between these  
337 different cell types.

338

339 We also do not yet know what downstream effector mechanisms are activated in neutrophils and  
340 macrophages by COX signaling to target fungal growth. Prostaglandins can mediate endothelial

341 cell permeability and facilitate immune cell infiltration, but we observe no difference in  
342 phagocyte recruitment when COX enzymes are inhibited (6, 37, 38). Prostaglandins can also  
343 regulate extracellular killing mechanisms in phagocytes such as reactive oxygen species (ROS)  
344 production, neutrophil degranulation, and extracellular trap (ET) formation (39-41). Further  
345 testing is required determine if these mechanisms are enhanced by COX signaling during  
346 infection with *A. fumigatus*.

347  
348 COX enzymes catalyze the main regulatory step of prostaglandin synthesis: conversion of  
349 arachidonic acid to prostaglandin H<sub>2</sub> (PGH<sub>2</sub>). PGH<sub>2</sub> is then converted to one of the four major  
350 types of prostaglandins, prostaglandin E<sub>2</sub> (PGE<sub>2</sub>), prostaglandin D<sub>2</sub> (PGD<sub>2</sub>), prostaglandin I<sub>2</sub>  
351 (PGI<sub>2</sub>) and prostaglandin F<sub>2α</sub> (PGF<sub>2α</sub>) via different synthases. Perhaps the most studied  
352 prostaglandin is PGE<sub>2</sub>, due to its paradoxical immunomodulatory effects (42). PGE<sub>2</sub> signals via  
353 four different receptors, EP1-EP4 which have different affinities for PGE<sub>2</sub>, and activate different  
354 downstream effects (26). PGE<sub>2</sub> binds to EP2 with low affinity and generally evokes pro-  
355 inflammatory responses while it binds to EP4 with high affinity and activates anti-inflammatory  
356 responses (26). Therefore, the downstream effects of PGE<sub>2</sub>, whether pro- or anti-inflammatory,  
357 depend on local PGE<sub>2</sub> concentration—which is controlled by its short half-life and the rate of  
358 synthesis by COX enzymes—and the cell type and EP receptor availability at the receiving end  
359 (42, 43).

360  
361 We report here that PGE<sub>2</sub> signaling, specifically through the EP2 receptor, promotes phagocyte  
362 control of *A. fumigatus* invasive hyphal growth. However, it was previously reported that PGE<sub>2</sub>  
363 suppresses phagocytosis and microbial killing of fungal pathogens such as *P. brasiliensis* (12),



364 *C. albicans* (13) and *C. neoformans* (14). These differences underline the idea that PGE<sub>2</sub> can  
365 have both pro- or anti-inflammatory functions, can differentially impact diverse fungi, and that  
366 PGE<sub>2</sub> levels must be tightly controlled during infection to promote infection clearance.  
367 Consistent with this idea, we report that while the effect of indomethacin on the control of fungal  
368 germination can be rescued by PGE<sub>2</sub> supplementation, exogenous PGE<sub>2</sub> in untreated infected  
369 larvae increases fungal growth. This could be due to elevated levels of PGE<sub>2</sub> activating anti-  
370 inflammatory pathways and suppressing immune cell-mediated fungal growth control. In line  
371 with this possibility, PGE<sub>2</sub> can drive resolution of inflammatory phenotypes through EP4 in  
372 zebrafish larvae during injury (28). Alternatively, the exogenous PGE<sub>2</sub> might directly act upon *A.*  
373 *fumigatus* to promote germination. A previous study showed that exogenous PGE<sub>2</sub> inhibited  
374 pigment formation in *A. fumigatus* hyphae which could affect invasive hyphal growth (24).  
375  
376 Fungal species can also synthesize their own lipid signaling molecules to modulate pathogenesis  
377 and immune responses (44, 45). For instance, *Cryptococcus neoformans* strains deficient in  
378 eicosanoid production have intracellular growth defects, which can be reversed by addition of  
379 exogenous PGE<sub>2</sub> in a zebrafish larvae model (27). *A. fumigatus* PpoA and PpoC enzyme activity  
380 can produce prostaglandins and similar bioactive oxylipins that can affect *Aspergillus* virulence  
381 and development (24) and phagocytosis of conidia (46). However, we find that *A. fumigatus* Ppo  
382 enzymes do not affect fungal virulence in this larval zebrafish infection model, and that  
383 indomethacin treatment does not alter *A. fumigatus* spore germination *in vitro*.  
384  
385 Overall, PGE<sub>2</sub> signaling must be well-orchestrated to elicit the desired anti- or pro-inflammatory  
386 effects. Hematopoietic stem cell transplant patients who are at high risk of developing IA harbor

387 elevated levels of PGE<sub>2</sub> (47), suggesting that modulating PGE<sub>2</sub> or the downstream effects of  
388 PGE<sub>2</sub> signaling may be a possible target for increasing control of these infections in patients.  
389 This study provides a first step towards understanding the function of this signaling in immune-  
390 mediated control of *A. fumigatus* infection.

391

## 392 **Materials and Methods**

### 393 **Ethics Statement**

394 Adult and larval zebrafish were maintained and handled according to protocols approved by the  
395 Clemson University Institutional Animal Care and Use Committee (AUP2018-070, AUP2019-  
396 012, and AUP2019-032). Buffered tricaine was used for anesthesia prior to any experimental  
397 manipulation of larvae. Adult zebrafish were euthanized with buffered tricaine and zebrafish  
398 embryos and larvae were euthanized at 4°C.

399

### 400 **Zebrafish lines and maintenance**

401 Zebrafish adults were maintained at 28°C at 14/10 hr light/dark cycles. All mutant and transgenic  
402 fish lines used in this study are listed in Table 1 and were maintained in the AB background.  
403 Upon natural spawning, embryos were collected and maintained in E3 medium with methylene  
404 blue at 28°C. Embryos were manually dechorionated and anesthetized in 0.3 mg/mL buffered  
405 tricaine prior to any experimental manipulations. Larvae used for imaging were exposed to 200  
406 µM N-phenylthiourea (PTU) starting at 24 hpf to inhibit pigment formation. Transgenic larvae  
407 were screened for fluorescence prior to experimentation. The *irf8* mutant line was maintained by  
408 outcrossing. *irf8*<sup>+/-</sup> adults with fluorescent neutrophils (*Tg(mpx:mCherry)*) were in-crossed to

409 generate *irf8*<sup>+/+</sup>, *irf8*<sup>+/-</sup> and *irf8*<sup>-/-</sup> larvae, and these larvae were screened for a high number of  
410 neutrophils to select *irf8*<sup>-/-</sup> individuals (48). Genotypes were additionally confirmed at the end of  
411 the experiment where possible.

412 **Table 1. Zebrafish lines used in this study.**

| Zebrafish line                     | Reference |
|------------------------------------|-----------|
| <i>irf8</i> <sup>-/-</sup>         | (48)      |
| <i>Tg(mpeg1:H2B-GFP)</i>           | (49)      |
| <i>Tg(mpeg1:H2B-mCherry)</i>       | (50)      |
| <i>Tg(mfap4:mTurquoise2)</i>       | (51)      |
| <i>Tg(lyz:BFP)</i>                 | (20)      |
| <i>Tg(mpx:mCherry)</i>             | (52)      |
| <i>Tg(mpx:mCherry-2A-rac2D57N)</i> | (30)      |

413

### 414 *Aspergillus fumigatus* strains

415 Most experiments used Af293-derived strains TBK1.1 expressing YFP (19) or TBK5.1  
416 expressing mCherry (20). Both of these strains behave like the parental Af293 strain in larval  
417 zebrafish (20). To test neutrophil-mediated killing, GFP-expressing TFYL49.1 (53) which was  
418 derived from the faster germinating CEA10 strain was used.

419 A  $\Delta ppoA$ ,  $\Delta ppoB$ ,  $\Delta ppoC$  triple-mutant strain ( $\Delta ppo$ , TMN31.10) was used to test the role of  
420 fungal oxylipins. In these experiments the control comparison strain used was wild-type Af293.  
421 Briefly, a previously published Af293  $\Delta ppoC$  *pyrG1* strain TDWC3.4 (24) was used as the  
422 parental strain in which *ppoA* and *ppoB* were subsequently deleted, using the *A. parasiticus pyrG*  
423 marker and recyclable hygromycin resistance marker *hph* (54), respectively. All primers used for

424 strain construction and confirmation are listed in S1 Table. DNA transformation constructs were  
425 created through double-joint PCR using published protocols (55). Protoplast generation and  
426 transformation were performed according to the previously published protocol (56). All  
427 transformants were first screened through PCR for incorporation of the construct and absence of  
428 the *ppo* gene. Southern blotting followed by hybridization of  $\alpha P^{32}$ -dCTP labeled 5' and 3' flank  
429 regions were used to confirm transformants with single integration (S2 Fig). The *ppoA* deletion  
430 construct was amplified from pDWC4.2 (GF *ppoA* del Cassette F and GF *ppoA* del Cassette R)  
431 and used to transform TDWC3.4, resulting in the prototroph Af293  $\Delta ppoC \Delta ppoA$  TMN20. A  
432 deletion cassette for *ppoB* was constructed by fusing ~1 kb 5' and 3' flanking regions of the gene  
433 with the recyclable hygromycin B resistance gene *hph* from pSK529. *ppoB* deletion cassette was  
434 used to transform TMN20.11, resulting in the *ppo* triple deletion mutant TMN31. TMN31  
435 transformants were subsequently grown on minimal medium with 0.1% xylose to recycle the  
436 hygromycin B marker.

437

## 438 **Spore preparation for injections**

439 For injection preparation,  $10^6$  spores were spread on solid glucose minimal media (GMM) 10 cm  
440 plates and grown at 37°C for 3-4 days. Spores were harvested by scraping using a disposable L-  
441 spreader and sterile water with 0.01% Tween. This spore suspension was passed through two  
442 layers of sterile miracloth into a 50 mL conical tube and topped to 50 mL. Spores were pelleted  
443 by centrifugation at 900 g for 10 min. The pellet was resuspended and washed in 50 mL of sterile  
444 PBS. The spores were again pelleted, resuspended in 5 mL of PBS, and filtered through another  
445 two layers of miracloth into a new conical tube. Spore concentration was enumerated using a

446 hemocytometer. A final spore suspension of  $1.5 \times 10^8$ / mL was made in PBS and stored at 4°C  
447 for up to ~1 month.

448

### 449 **Live-dead spore labeling**

450 Spores of *A. fumigatus* strain TBK1.1 were coated with AlexaFluor546 as described previously  
451 (20, 32). Briefly, isolated spores were incubated with biotin-XX, SSE (Molecular Probes) in the  
452 presence of 0.05 M NaHCO<sub>3</sub> at 4°C for 2 hours. Spores were pelleted, washed first with 100 mM  
453 Tris-HCl at pH 8.0 to deactivate free-floating biotin and next with PBS, followed by incubation  
454 with streptavidin-AlexaFluor546 (Invitrogen). Spore concentration was enumerated and  
455 resuspended in PBS at  $1.5 \times 10^8$ / mL. Labeling was confirmed with fluorescence microscopy  
456 prior to injections.

457

### 458 **Zebrafish hindbrain microinjections**

459 Larvae were injected with spores as described previously (16). Prepared spore suspensions at  $1.5$   
460  $\times 10^8$ / mL were mixed at 2:1 with filter-sterilized 1% phenol red to achieve a final spore  
461 concentration of  $1 \times 10^8$ / mL. Injection plates were made with 2% agarose in E3 and coated with  
462 filter-sterilized 2% bovine serum albumin (BSA) prior to injections. Anesthetized 2 days post  
463 fertilization (dpf) larvae were placed on the agarose on their lateral side. A microinjection setup  
464 supplied with pressure injector, micromanipulator, micropipet holder, footswitch and back  
465 pressure unit (Applied Scientific Instrumentation) was used to inject 30-50 spores into the  
466 hindbrain ventricle of each larva. Larvae were injected with PBS as a mock-infection control.  
467 After injections, larvae were rinsed at least twice with E3 without methylene blue to remove

468 tricaine and any free spores and were transferred to 96-well plates for survival and CFU  
469 experiments and to 48-well plates for imaging experiments.

470

## 471 **Clodronate liposome injections**

472 *Tg(mpeg1:H2B-GFP)* larvae at 1.5 dpf were manually dechorionated and screened for GFP  
473 expression. 50  $\mu$ L of clodronate or PBS liposomes (Liposoma) was mixed with 5  $\mu$ L of filter-  
474 sterilized 1% phenol red and 2 nL was intravenously injected into the caudal vein plexus of GFP-  
475 positive larvae. After 24 hours, depletion of macrophages was confirmed by loss of GFP signal  
476 by screening with a fluorescent zoomscope (Zeiss SteREO Discovery.V12 PentaFluar with  
477 Achromat S 1.0x objective) prior to *A. fumigatus* infections.

478

## 479 **Morpholino injections**

480 *A pu.1 (spi1b)* morpholino oligonucleotide (MO) was previously published and validated (5'-  
481 GATATACTGATACTCCATTGGTGGT-3') (ZFIN MO1-spi1b) (29) (GeneTools). Stock  
482 solutions were made by resuspension in water to 1 mM and kept at 4°C. For injections, the stock  
483 was diluted to 0.5 mM in water with 0.1% filter-sterilized phenol red and 0.5X CutSmart Buffer  
484 (New England Biolabs). A standard control MO (GeneTools) at 0.5 mM was used as an injection  
485 control. 3 nl of injection mix was injected into the yolk of 1-2 cell stage embryos. Efficacy of  
486 *pu.1* knockdown was determined by injecting MO into a macrophage-labeled zebrafish line and  
487 larvae were checked for fluorescence expression prior to *A. fumigatus* infections.

488

## 489 **Drug treatments**

490 Infected larvae were exposed to the pan-COX inhibitor indomethacin (Sigma-Aldrich) at 10  $\mu$ M,  
491 COX1 inhibitor SC560 (Cayman Chemical) at 5  $\mu$ M, COX2 inhibitor meloxicam (Cayman  
492 Chemical) at 15  $\mu$ M, EP2 receptor antagonist AH6809 (Cayman Chemical) at 5  $\mu$ M or EP4  
493 receptor antagonist AH23848 (Cayman Chemical) at 10  $\mu$ M. These drugs were previously used  
494 in zebrafish larvae (21-23, 27, 28). The indomethacin concentration used was based on published  
495 results. For all other drugs, multiple concentrations were tested and the highest concentration of  
496 each drug that did not cause lethality or edema in uninfected larvae was used. 1000X stock  
497 solutions were made in DMSO and 0.1% DMSO was used as a vehicle control. After rinsing  
498 infected larvae, pre-mixed E3 with drug was added to dishes containing larvae. For survival and  
499 CFU assays, larvae were transferred to 96-well plates, one larva/well in 200  $\mu$ L of drug/vehicle  
500 solution. For imaging experiments, larvae were transferred to 48-well plates with 500  $\mu$ L of  
501 solution. All larvae were kept in the same drug solution for the entirety of the experiment unless  
502 otherwise noted.

503

## 504 **PGE<sub>2</sub> rescue injections**

505 A stock solution of 10 mM PGE<sub>2</sub> (Cayman Chemical) was made in DMSO (23, 27). Prior to  
506 injection, the stock was diluted 100X in PBS and 1  $\mu$ L was mixed with 9  $\mu$ L of 1% phenol red  
507 for a final concentration of 10  $\mu$ M. Wild-type larvae were injected with *A. fumigatus* and  
508 exposed to 10  $\mu$ M indomethacin or DMSO vehicle control in 10 mL of E3 in 60 mm petri dishes.  
509 At 1 dpi, larvae were anesthetized and injected with 1 nL of 10  $\mu$ M PGE<sub>2</sub> or 0.1% DMSO into  
510 the hindbrain. After injections, indomethacin or DMSO control treatments were renewed, and  
511 larvae were transferred to 96-well plates for survival and 48-well plates for imaging experiments.

512

## 513 **CFU counts**

514 Single larvae were placed in 1.7 mL microcentrifuge tubes in 90  $\mu$ l PBS containing 1 mg/mL  
515 ampicillin and 0.5 mg/mL kanamycin, homogenized in a tissue lyser (Qiagen) at 1800  
516 oscillations/min (30 Hz) for 6 min and spun down at 17000 g for 30 seconds. The whole  
517 suspension was spread on a GMM plate and incubated for 3 days at 37°C and the number of  
518 fungal colonies were counted. For all survival experiments, 8 larvae from each condition were  
519 plated immediately after injection to confirm actual injection dose and these numbers are  
520 reported in all figure legends. For CFU experiments to monitor fungal burden over time, 8 larvae  
521 were plated for each condition, each day and CFU counts were normalized to the average initial  
522 injection dose for that condition and graphed as percent initial spore burden.

523

## 524 **Live imaging**

525 For daily imaging and PGE<sub>2</sub> rescue experiments, individual larvae were removed from 48-well  
526 plates, anesthetized in tricaine and transferred to a zWEDGI device (57, 58). Larvae were  
527 imaged using a Zeiss Cell Observer Spinning Disk confocal microscope on a Axio Observer 7  
528 microscope stand with a confocal scanhead (Yokogawa CSU-X) and a Photometrics Evolve 512  
529 EMCCD camera. A Plan-Apochromat 20x objective (0.8 NA) and ZEN software were used to  
530 acquire Z-stack images of the hindbrain area with 5  $\mu$ m distance between slices. After imaging,  
531 larvae were rinsed with 200  $\mu$ M PTU in E3 and put back in the same well (16). For AlexaFluor  
532 labeled live-dead staining, infected larvae at 2 dpi were mounted in 1% low-melting point  
533 agarose (Fisher BioReagents) in a 35mm glass-bottom dish (Greiner) and oriented laterally.



534 Images were acquired using the same spinning disk confocal microscope with an EC Plan-  
535 Neofluar 40x objective (0.75 NA) with 2.5  $\mu\text{m}$  distance between slices.

536

## 537 **Image analysis**

538 All images were analyzed using Image J/Fiji (59). Presence of germination and invasive hyphae  
539 were manually analyzed. Any kind of hyphal growth, whether single or branched was considered  
540 an incidence of germination, while the presence of branched hyphae was considered an incidence  
541 of invasive hyphae. Maximum intensity projections were used to measure the 2D fungal area  
542 after thresholding the fluorescent intensity. The number of recruited phagocytes were counted  
543 across z-stacks using the Cell Counter plugin. For 2D phagocyte cluster area, the polygon  
544 selection tool was used to select and measure the area of macrophage cluster from maximum  
545 intensity projection of z-stacks. Images from the same experiments were used to quantify  
546 incidence of germination and invasive hyphae, fungal area, and phagocyte recruitment. To  
547 quantify live versus dead spores, images were blinded and processed with bilinear interpolation  
548 to increase pixel density two-fold. Cell Counter was used to manually count the number of live  
549 and dead spores in z-slices. All displayed images were processed in Fiji with bilinear  
550 interpolation to increase pixel density two-fold and are displayed as maximum intensity  
551 projections of z-stacks. Live versus dead spore images were additionally processed with a  
552 gaussian blur (radius = 1) to reduce noise.

553

## 554 ***Aspergillus fumigatus* in vitro germination assay**

555 1 X 10<sup>6</sup> TBK1.1 spores were inoculated into a flask containing 3 ml RPMI 1640 medium with  
556 HEPES (Gibco) containing 2% glucose in a 37°C shaker at 100 rpm in triplicate. Every 2 hours,  
557 10 µL of the spore suspension was pipetted on to a microscope slide with a cover glass and  
558 imaged under the same Zeiss spinning disk confocal microscope using a Plan-Apochromat 20x  
559 objective (0.8 NA). At least 10 fields were captured for each sample at each time point and  
560 imaging was continued until 8 hours post seeding. These images were blinded prior to analysis  
561 and the number of germinated and non-germinated spores were counted using the Fiji Cell  
562 Counter plugin.

563

## 564 **Statistical analysis**

565 For all experiments, pooled data from at least three independent replicates were generated and  
566 total pooled Ns are given in each figure. Statistical analyses were performed using R version  
567 4.1.0 and graphs were generated using GraphPad Prism version 7 (GraphPad Software). Larval  
568 survival data and cumulative appearance of larvae with germination or invasive hyphae were  
569 analyzed by Cox proportional hazard regression. Calculated experimental P values and hazard  
570 ratios (HR) are displayed in each figure. HR defines how likely larvae in a particular condition  
571 will succumb to the infection compared to control larvae. Occasionally, the indomethacin drug  
572 lost efficacy and did not cause the previously observed and confirmed survival defect. Any such  
573 replicates were omitted from the final statistical analysis. CFU counts, spore killing, fungal area,  
574 phagocyte numbers and cluster area, and comparisons of day of onset of germination and  
575 invasive hyphae were analyzed with analysis of variance (ANOVA). For each condition,  
576 estimated marginal means (emmeans) and standard error (SEM) were calculated and pairwise

577 comparisons were performed with Tukey's adjustment. The graphs of number of phagocytes,  
578 phagocyte cluster area and 2D fungal area over the infection period show values from individual  
579 larvae over time as individual lines, and bars represent pooled emmeans  $\pm$  SEM. Data points in  
580 dot plots represent individual larvae and are color-coded based on replicate and bars represent  
581 pooled emmeans  $\pm$  SEM. For the *in vitro* germination assay, data were pooled from two  
582 independent replicates, each consisting of three technical replicates. Statistical analysis was  
583 performed by Student's T-test with Holm-Sidak method using GraphPad Prism version 7, and  
584 data points represent pooled means  $\pm$  SEM.

585

## 586 **Acknowledgments**

587 We thank David Tobin for providing the *mfap4:mTurquoise2* zebrafish line. We thank Celia  
588 Shiau for providing the *irf8* mutant zebrafish line. We thank Anna Huttenlocher for sharing all  
589 other transgenic zebrafish lines. We thank members of the Rosowski Lab and Keller Lab for  
590 helpful discussions.

591

## 592 **References**

- 593 1. Latge JP. *Aspergillus fumigatus* and aspergillosis. *Clinical microbiology reviews*.  
594 1999;12(2):310-50.
- 595 2. Baddley JW. Clinical risk factors for invasive aspergillosis. *Medical mycology*. 2011;49  
596 Suppl 1:S7-S12.
- 597 3. Denning DW. Invasive aspergillosis. *Clinical infectious diseases*. 1998;26(4):781-803.
- 598 4. Lin SJ, Schranz J, Teutsch SM. Aspergillosis case-fatality rate: systematic review of the  
599 literature. *Clinical infectious diseases*. 2001;32(3):358-66.
- 600 5. Gregg KS, Kauffman CA. Invasive Aspergillosis: Epidemiology, Clinical Aspects, and  
601 Treatment. *Seminars in respiratory and critical care medicine*. 2015;36(5):662-72.
- 602 6. Ricciotti E, FitzGerald GA. Prostaglandins and inflammation. *Arteriosclerosis,*  
603 *thrombosis, and vascular biology*. 2011;31(5):986-1000.
- 604 7. Funk CD. Prostaglandins and leukotrienes: advances in eicosanoid biology. *Science*  
605 (New York, NY). 2001;294(5548):1871-5.
- 606 8. Smith WL, DeWitt DL, Garavito RM. Cyclooxygenases: structural, cellular, and  
607 molecular biology. *Annual review of biochemistry*. 2000;69:145-82.
- 608 9. Vane JR. Inhibition of Prostaglandin Synthesis as a Mechanism of Action for Aspirin-  
609 like Drugs. *Nature New Biology*. 1971;231(25):232-5.
- 610 10. Williams CS, Mann M, DuBois RN. The role of cyclooxygenases in inflammation,  
611 cancer, and development. *Oncogene*. 1999;18(55):7908-16.
- 612 11. Tilley SL, Coffman TM, Koller BH. Mixed messages: modulation of inflammation and  
613 immune responses by prostaglandins and thromboxanes. *Journal of Clinical Investigation*.  
614 2001;108(1):15-23.

- 615 12. Bordon AP, Dias-Melicio LA, Acorci MJ, Calvi SA, Serrão Peraçoli MT, Victoriano de  
616 Campos Soares AM. Prostaglandin E2 inhibits *Paracoccidioides brasiliensis* killing by human  
617 monocytes. *Microbes and Infection*. 2007;9(6):744-7.
- 618 13. Serezani CH, Kane S, Medeiros AI, Cornett AM, Kim SH, Marques MM, et al. PTEN  
619 directly activates the actin depolymerization factor cofilin-1 during PGE2-mediated inhibition of  
620 phagocytosis of fungi. *Science signaling*. 2012;5(210):ra12.
- 621 14. Shen L, Liu Y. Prostaglandin E2 blockade enhances the pulmonary anti-*Cryptococcus*  
622 *neoformans* immune reaction via the induction of TLR-4. *International Immunopharmacology*.  
623 2015;28(1):376-81.
- 624 15. Rosowski EE. Illuminating Macrophage Contributions to Host-Pathogen Interactions In  
625 Vivo: the Power of Zebrafish. *Infection and immunity*. 2020;88(7).
- 626 16. Thrikawala S, Rosowski EE. Infection of Zebrafish Larvae with *Aspergillus* Spores for  
627 Analysis of Host-Pathogen Interactions. *Journal of visualized experiments*. 2020(159).
- 628 17. Traver D, Herbomel P, Patton EE, Murphey RD, Yoder JA, Litman GW, et al. The  
629 Zebrafish as a Model Organism to Study Development of the Immune System. *Advances in*  
630 *Immunology*. 2003;81:254-330.
- 631 18. Herbomel P, Thisse B, Thisse C. Ontogeny and behaviour of early macrophages in the  
632 zebrafish embryo. *Development*. 1999;126(17):3735-45.
- 633 19. Knox BP, Deng Q, Rood M, Eickhoff JC, Keller NP, Huttenlocher A. Distinct innate  
634 immune phagocyte responses to *Aspergillus fumigatus* conidia and hyphae in zebrafish larvae.  
635 *Eukaryotic cell*. 2014;13(10):1266-77.

- 636 20. Rosowski EE, Raffa N, Knox BP, Golenberg N, Keller NP, Huttenlocher A.  
637 Macrophages inhibit *Aspergillus fumigatus* germination and neutrophil-mediated fungal killing.  
638 PLoS pathogens. 2018;14(8):e1007229.
- 639 21. Tyrkalska SD, Candel S, Angosto D, Gomez-Abellan V, Martin-Sanchez F, Garcia-  
640 Moreno D, et al. Neutrophils mediate *Salmonella Typhimurium* clearance through the GBP4  
641 inflammasome-dependent production of prostaglandins. Nature communications. 2016;7:12077.
- 642 22. Jin D, Ni TT, Sun J, Wan H, Amack JD, Yu G, et al. Prostaglandin signalling regulates  
643 ciliogenesis by modulating intraflagellar transport. Nature cell biology. 2014;16(9):841-51.
- 644 23. Lewis A, Elks PM. Hypoxia Induces Macrophage tnf $\alpha$  Expression via Cyclooxygenase  
645 and Prostaglandin E2 in vivo. Frontiers in immunology. 2019;10:2321.
- 646 24. Tsitsigiannis DI, Bok JW, Andes D, Nielsen KF, Frisvad JC, Keller NP. *Aspergillus*  
647 cyclooxygenase-like enzymes are associated with prostaglandin production and virulence.  
648 Infection and immunity. 2005;73(8):4548-59.
- 649 25. Kupfahl C, Tsikas D, Niemann J, Geginat G, Hof H. Production of prostaglandins,  
650 isoprostanes and thromboxane by *Aspergillus fumigatus*: identification by gas chromatography-  
651 tandem mass spectrometry and quantification by enzyme immunoassay. Molecular immunology.  
652 2012;49(4):621-7.
- 653 26. Hata AN, Breyer RM. Pharmacology and signaling of prostaglandin receptors: multiple  
654 roles in inflammation and immune modulation. Pharmacol Ther. 2004;103(2):147-66.
- 655 27. Evans RJ, Pline K, Loynes CA, Needs S, Aldrovandi M, Tiefenbach J, et al. 15-keto-  
656 prostaglandin E2 activates host peroxisome proliferator-activated receptor gamma (PPAR-  
657 gamma) to promote *Cryptococcus neoformans* growth during infection. PLoS pathogens.  
658 2019;15(3):e1007597.

- 659 28. Loynes CA, Lee JA, Robertson AL, Steel MJ. PGE(2) production at sites of tissue injury  
660 promotes an anti-inflammatory neutrophil phenotype and determines the outcome of  
661 inflammation resolution in vivo. *Science advances*. 2018;4(9):eaar8320.
- 662 29. Rhodes J, Hagen A, Hsu K, Deng M, Liu TX, Look AT, et al. Interplay of pu.1 and gata1  
663 determines myelo-erythroid progenitor cell fate in zebrafish. *Developmental cell*. 2005;8(1):97-  
664 108.
- 665 30. Deng Q, Yoo SK, Cavnar PJ, Green JM, Huttenlocher A. Dual roles for Rac2 in  
666 neutrophil motility and active retention in zebrafish hematopoietic tissue. *Developmental cell*.  
667 2011;21(4):735-45.
- 668 31. Knox BP, Blachowicz A, Palmer JM, Romsdahl J, Huttenlocher A, Wang CC, et al.  
669 Characterization of *Aspergillus fumigatus* Isolates from Air and Surfaces of the International  
670 Space Station. *mSphere*. 2016;1(5).
- 671 32. Jhingran A, Mar KB, Kumasaka DK, Knoblauch SE, Ngo LY, Segal BH, et al. Tracing  
672 conidial fate and measuring host cell antifungal activity using a reporter of microbial viability in  
673 the lung. *Cell reports*. 2012;2(6):1762-73.
- 674 33. Langenbach R, Morham SG, Tiano HF, Loftin CD, Ghanayem BI, Chulada PC, et al.  
675 Prostaglandin synthase 1 gene disruption in mice reduces arachidonic acid-induced inflammation  
676 and indomethacin-induced gastric ulceration. *Cell*. 1995;83(3):483-92.
- 677 34. McAdam BF, Mardini IA, Habib A, Burke A, Lawson JA, Kapoor S, et al. Effect of  
678 regulated expression of human cyclooxygenase isoforms on eicosanoid and isoeicosanoid  
679 production in inflammation. *The Journal of clinical investigation*. 2000;105(10):1473-82.

- 680 35. Ishikawa TO, Griffin KJ, Banerjee U, Herschman HR. The zebrafish genome contains  
681 two inducible, functional cyclooxygenase-2 genes. *Biochemical and biophysical research*  
682 *communications*. 2007;352(1):181-7.
- 683 36. Harizi H. The Immunobiology of Prostanoid Receptor Signaling in Connecting Innate  
684 and Adaptive Immunity. *BioMed research international*. 2013;2013:683405.
- 685 37. Martínez-Colón GJ, Moore BB. Prostaglandin E(2) as a Regulator of Immunity to  
686 Pathogens. *Pharmacol Ther*. 2018;185:135-46.
- 687 38. Medeiros A, Peres-Buzalaf C, Fortino Verdán F, Serezani CH. Prostaglandin E2 and the  
688 suppression of phagocyte innate immune responses in different organs. *Mediators of*  
689 *inflammation*. 2012;2012:327568.
- 690 39. Shishikura K, Horiuchi T, Sakata N, Trinh DA, Shirakawa R, Kimura T, et al.  
691 Prostaglandin E2 inhibits neutrophil extracellular trap formation through production of cyclic  
692 AMP. *British journal of pharmacology*. 2016;173(2):319-31.
- 693 40. Rossi AG, O'Flaherty JT. Prostaglandin binding sites in human polymorphonuclear  
694 neutrophils. *Prostaglandins*. 1989;37(6):641-53.
- 695 41. Serezani CH, Chung J, Ballinger MN, Moore BB, Aronoff DM, Peters-Golden M.  
696 Prostaglandin E2 suppresses bacterial killing in alveolar macrophages by inhibiting NADPH  
697 oxidase. *American journal of respiratory cell and molecular biology*. 2007;37(5):562-70.
- 698 42. Kalinski P. Regulation of immune responses by prostaglandin E2. *Journal of*  
699 *immunology*. 2012;188(1):21-8.
- 700 43. Goodwin JS, Ceuppens J. Regulation of the immune response by prostaglandins. *Journal*  
701 *of clinical immunology*. 1983;3(4):295-315.



- 702 44. Mendoza SR, Zamith-Miranda D, Takács T, Gacser A, Nosanchuk JD, Guimarães AJ.  
703 Complex and Controversial Roles of Eicosanoids in Fungal Pathogenesis. *Journal of fungi*  
704 (Basel, Switzerland). 2021;7(4):254.
- 705 45. Erb-Downward JR, Noverr MC. Characterization of prostaglandin E2 production by  
706 *Candida albicans*. *Infection and immunity*. 2007;75(7):3498-505.
- 707 46. Dagenais TR, Chung D, Giles SS, Hull CM, Andes D, Keller NP. Defects in  
708 conidiophore development and conidium-macrophage interactions in a dioxygenase mutant of  
709 *Aspergillus fumigatus*. *Infection and immunity*. 2008;76(7):3214-20.
- 710 47. Cayeux SJ, Beverley PC, Schulz R, Dörken B. Elevated plasma prostaglandin E2 levels  
711 found in 14 patients undergoing autologous bone marrow or stem cell transplantation. *Bone*  
712 marrow transplantation. 1993;12(6):603-8.
- 713 48. Shiau CE, Kaufman Z, Meireles AM, Talbot WS. Differential requirement for irf8 in  
714 formation of embryonic and adult macrophages in zebrafish. *PloS one*. 2015;10(1):e0117513.
- 715 49. Miskolci V, Squirrell J, Rindy J, Vincent W, Sauer JD, Gibson A, et al. Distinct  
716 inflammatory and wound healing responses to complex caudal fin injuries of larval zebrafish.  
717 *eLife*. 2019;8:e45976.
- 718 50. Vincent WJ, Freisinger CM, Lam PY, Huttenlocher A, Sauer JD. Macrophages mediate  
719 flagellin induced inflammasome activation and host defense in zebrafish. *Cellular microbiology*.  
720 2016;18(4):591-604.
- 721 51. Walton EM, Cronan MR, Beerman RW, Tobin DM. The Macrophage-Specific Promoter  
722 *mfap4* Allows Live, Long-Term Analysis of Macrophage Behavior during Mycobacterial  
723 Infection in Zebrafish. *PloS one*. 2015;10(10):e0138949.

- 724 52. Yoo SK, Deng Q, Cavnar PJ, Wu YI, Hahn KM, Huttenlocher A. Differential Regulation  
725 of Protrusion and Polarity by PI(3)K during Neutrophil Motility in Live Zebrafish.  
726 *Developmental cell*. 2010;18(2):226-36.
- 727 53. Lim FY, Ames B, Walsh CT, Keller NP. Co-ordination between BrlA regulation and  
728 secretion of the oxidoreductase FmqD directs selective accumulation of fumiquinazoline C to  
729 conidial tissues in *Aspergillus fumigatus*. *Cellular microbiology*. 2014;16(8):1267-83.
- 730 54. Hartmann T, Dümig M, Jaber BM, Szewczyk E, Olbermann P, Morschhäuser J, et al.  
731 Validation of a self-excising marker in the human pathogen *Aspergillus fumigatus* by employing  
732 the beta-rec/six site-specific recombination system. *Applied and environmental microbiology*.  
733 2010;76(18):6313-7.
- 734 55. Lim FY, Sanchez JF, Wang CC, Keller NP. Toward awakening cryptic secondary  
735 metabolite gene clusters in filamentous fungi. *Methods in enzymology*. 2012;517:303-24.
- 736 56. Szewczyk E, Nayak T, Oakley CE, Edgerton H, Xiong Y, Taheri-Talesh N, et al. Fusion  
737 PCR and gene targeting in *Aspergillus nidulans*. *Nat Protoc*. 2006;1(6):3111-20.
- 738 57. Huemer K, Squirrell JM, Swader R, LeBert DC, Huttenlocher A, Eliceiri KW. zWEDGI:  
739 Wounding and Entrapment Device for Imaging Live Zebrafish Larvae. *Zebrafish*. 2017;14(1):42-  
740 50.
- 741 58. Huemer K, Squirrell JM, Swader R, Pelkey K, LeBert DC, Huttenlocher A, et al. Long-  
742 term Live Imaging Device for Improved Experimental Manipulation of Zebrafish Larvae.  
743 *Journal of Visualized Experiments*. 2017(128).
- 744 59. Schindelin J, Arganda-Carreras I, Frise E, Kaynig V, Longair M, Pietzsch T, et al. Fiji: an  
745 open-source platform for biological-image analysis. *Nature methods*. 2012;9(7):676-82.
- 746

## 747 **Figure legends**

748

### 749 **Fig. 1. Host cyclooxygenase signaling promotes survival of *A. fumigatus*-infected larvae. (A)**

750 Survival of wild-type larvae injected at 2 dpf with TBK1.1 (Af293) *A. fumigatus* spores or PBS

751 mock injection in the presence of 10  $\mu$ M indomethacin or DMSO vehicle control. **(B)** Survival of

752 larvae injected at 2 dpf with *A. fumigatus* Af293 or Af293 triple-*ppo*-mutant ( $\Delta$ *ppo*) spores and

753 exposed to 10  $\mu$ M indomethacin or DMSO vehicle control. **(C)** Survival of larvae injected at 2

754 dpf with TBK1.1 (Af293) spores and exposed to 10  $\mu$ M indomethacin, 5  $\mu$ M AH6809, 10  $\mu$ M

755 AH23848, or DMSO vehicle control. Data are pooled from at least three independent replicates

756 and the total larval N per condition is indicated in each figure. Cox proportional hazard

757 regression analysis was used to calculate P values and hazard ratios (HR). Average injection

758 CFUs: (A) 50, (B) Af293 = 40 and  $\Delta$ *ppo* = 58, (C) 28.

759

### 760 **Fig. 2. Cyclooxygenase-mediated host protection depends on phagocytes.** Survival of larvae

761 injected with TBK1.1 (Af293) spores at 2 dpf. **(A)** Development of phagocytes was inhibited by

762 *pu.1* morpholino (MO). Control larvae received standard control MO. **(B)** Macrophages were

763 depleted via clodronate liposome i.v. injection at 1 dpf. Control larvae received PBS liposomes.

764 **(C)** Neutrophil-defective larvae (*mpx:rac2D57N*) were compared to wild-type larvae. Data are

765 pooled from three independent replicates and the total larval N per condition is indicated in each

766 figure. Cox proportional hazard regression analysis was used to calculate P values and hazard

767 ratios (HR). Average injection CFUs: (A) control MO = 25, *pu.1* MO = 24, (B) PBS liposomes =

768 20, clodronate liposomes = 23, (C) wild-type = 26, *mpx:rac2D57N* = 22.

769

770 **Fig. 3. Cyclooxygenase inhibition does not alter phagocyte recruitment.** Larvae were injected  
771 with mCherry-expressing *A. fumigatus* TBK5.1 (Af293) spores at 2 dpf. After injection larvae  
772 were exposed to 10  $\mu$ M indomethacin or DMSO vehicle control and were imaged through 5 dpi.  
773 (A) Schematic showing the infection and imaging area of zebrafish larvae. (B, D, E, G)  
774 Macrophage nuclear-labeled *Tg(mpeg1:H2B-GFP)* larvae were imaged at 1, 2, 3, and 5 dpi. (C,  
775 F, H) Neutrophil-labeled *Tg(lyz:BFP)* larvae were imaged at 2, 3, and 5 dpi. (B, C)  
776 Representative z-projection images showing macrophage and neutrophil recruitment. Scale bars  
777 = 50  $\mu$ m. (D) Number of macrophages recruited, (E) 2D macrophage cluster area, and (F)  
778 number of neutrophils recruited were quantified. Each line represents an individual larva  
779 followed for the entire course of infection and bars represent pooled emmeans  $\pm$  SEM from four  
780 independent replicates, at least 12 larvae per condition, per replicate. P values were calculated by  
781 ANOVA. (G) Number of macrophages and (H) neutrophils one day before germination occurred,  
782 on the day of germination, and on the day invasive hyphae occurred were quantified. Bars  
783 represent pooled emmeans  $\pm$  SEM from all larvae with germination from four independent  
784 replicates. Data points represent individual larva and are color coded by replicate. P values were  
785 calculated by ANOVA.

786

787 **Fig. 4. Cyclooxygenase inhibition does not affect spore killing.** (A, B) Macrophage-labeled  
788 larvae *Tg(mfap4:mTurquoise2)* were injected with YFP-expressing *A. fumigatus* TBK1.1  
789 (Af293) spores coated with AlexaFluor 546 at 2 dpf, exposed to 10  $\mu$ M indomethacin or DMSO  
790 vehicle control, and imaged at 2 dpi. (A) Representative images showing live (white arrow) and  
791 dead (open arrow) spores within a macrophage. Scale bar = 10  $\mu$ m. Z projection of three slices.  
792 (B) The percentage of live spores in the hindbrain, and specifically within macrophages, per

793 larvae. Each data point represents an individual larvae, color-coded by replicate (indomethacin n  
794 = 31, DMSO n = 30). Bars represent pooled emmeans  $\pm$  SEM from three independent replicates,  
795 P values calculated by ANOVA. (C) Wild-type larvae were injected with TBK1.1 (Af293)  
796 spores at 2 dpf, exposed to 10  $\mu$ M indomethacin or DMSO vehicle control, and fungal burden  
797 was quantified by homogenizing and plating individual larvae for CFUs at multiple days post  
798 injection. Eight larvae per condition, per dpi, per replicate were quantified, and the number of  
799 CFUs at each dpi is represented as a percentage of the initial spore burden. Bars represent pooled  
800 emmeans  $\pm$  SEM from three individual replicates, P values calculated by ANOVA. Average  
801 injection CFUs: 27.

802

803 **Fig. 5. Cyclooxygenase inhibition decreases immune control of fungal germination and**  
804 **invasive hyphal growth.** Zebrafish larvae were injected with mCherry-expressing TBK5.1  
805 (Af293) spores at 2 dpf, exposed to 10  $\mu$ M indomethacin or DMSO vehicle control and imaged  
806 at 1, 2, 3, and 5 dpi. (A) Representative images showing spore germination (inset white arrow)  
807 and invasive hyphae (branched hyphae, inset open white arrow). Scale bar = 50  $\mu$ m (10  $\mu$ m in  
808 insets). (B) Cumulative percentage of larvae with germination (dotted line) and invasive hyphae  
809 (solid line) through 5 dpi. Cox proportional hazard regression analysis was used to calculate P  
810 values. (C) 2D fungal area was quantified from image z projections. Each line represents an  
811 individual larva and bars represent pooled emmeans  $\pm$  SEM from 8 independent replicates, at  
812 least 12 larvae per condition, per replicate. (D) Severity of fungal growth was scored for all  
813 larvae and displayed as a heatmap. Representative images for each score can be found in S5 Fig.  
814 (E-G) In larvae in which (E) germination (indomethacin n = 61, DMSO n = 45) and (F) invasive  
815 hyphae occurred (indomethacin n = 42, DMSO n = 27), the day on which each was first observed

816 is plotted. (G) The number of days between germination and invasive hyphae was also  
817 calculated. Bars represent pooled emmeans  $\pm$  SEM from eight individual replicates, P values  
818 calculated by ANOVA. Each data point represents an individual larvae, color-coded by replicate.

819

820 **Fig. 6. Exogenous PGE<sub>2</sub> can rescue the indomethacin-mediated increase in fungal**

821 **germination and hyphal growth.** Larvae were injected with mCherry-expressing TBK5.1

822 (Af293) spores and exposed to 10  $\mu$ M indomethacin or DMSO vehicle control at 2 dpf. At 1 dpi,

823 larvae were injected with 10  $\mu$ M PGE<sub>2</sub> or DMSO vehicle control. (A) Survival of wild-type

824 larvae was monitored. Cox proportional hazard regression analysis was used to calculate P

825 values and hazard ratios (HR). Data are pooled from four independent replicates, and total larval

826 N per condition is indicated in figure. Average injection CFUs: 40. (B-D) Larvae were imaged at

827 3 dpi. (B) Percentage of larvae with germination and invasive hyphae, and (C) 2D fungal area in

828 each condition. Data pooled from three independent replicates, at least 8 larvae per condition, per

829 replicate, P values calculated by ANOVA. (C) Bars represent pooled emmeans  $\pm$  SEM. (D)

830 Representative images showing hyphal growth in each condition. Scale bars = 50  $\mu$ m.

831

832 **Fig. 7. Model of cyclooxygenase signaling in response to *A. fumigatus* growth.** COX enzymes

833 produce prostaglandin signaling molecule, including PGE<sub>2</sub>. PGE<sub>2</sub> can bind to the EP2 receptor to

834 exert pro-inflammatory effects. Zebrafish larvae injected with *A. fumigatus*, this signaling

835 activates both macrophages and neutrophils to inhibit spore germination and development of

836 invasive hyphal growth.

837

## 838 **Supporting Information**

### 839 **S1. Fig. Both cyclooxygenase-1 and -2 signaling contribute to survival of infected larvae.**

840 Larvae were injected with TBK1.1 (Af293) *A. fumigatus* spores at 2 dpf and were exposed to (A)  
841 5  $\mu$ M SC560, (B) 15  $\mu$ M meloxicam, or DMSO vehicle control. Survival was monitored for 7  
842 days. Cox proportional hazard regression analysis was used to calculate P values and hazard  
843 ratios (HR). Data are pooled from three independent experiments and the total larvae number is  
844 indicated in each figure. Average injection CFUs: (A) 35, (B) 30.

845

846 **S2. Fig. Southern blot analyses of strains created in this study.** Confirmation of (A) TMN20  
847 Af293  $\Delta ppoC \Delta ppoA$  double mutant and (B) TMN31 Af293  $\Delta ppoC \Delta ppoA \Delta ppoB$  triple mutant.

848 Restriction enzyme digestion, southern blotting and hybridization were performed as mentioned  
849 in the Materials and Methods. Double and triple *ppo* mutants were created in sequence.

850 Hybridization of  $\alpha P^{32}$ -dCTP labeled 5' and 3' flank regions were used to confirm transformants.

851 The parental strain and the size of DNA fragments used to probe for southern blotting and  
852 hybridization are shown in each figure. P = parental strain; T = transformants.

853

854 **S3. Fig. Survival of phagocyte-deficient larvae after PBS mock-infection.** (A) Wild-type  
855 larvae injected with standard control MO or *pu.1* MO, (B) larvae injected with PBS liposomes or

856 clodronate liposomes and (C) larvae with defective neutrophils (*mpx:rac2D57N*) or wild-type

857 neutrophils were injected with PBS at 2 dpf. Survival was monitored in the presence of 10  $\mu$ M

858 indomethacin or DMSO vehicle control. Data are pooled from three independent experiments

859 and Cox proportional hazard regression analysis was used to calculate P values and hazard ratios

860 (HR).

861

862 **S4. Fig. Indomethacin does not affect *A. fumigatus* spore germination *in vitro*.** TBK1.1

863 (Af293) spores were inoculated into RPMI media in the presence of 10  $\mu$ M indomethacin or

864 DMSO vehicle control. Every 2 hours, an aliquot of spores was removed and scored for

865 germination. Points represent pooled means  $\pm$  SEM from two independent replicates and P

866 values calculated by Student's T-test.

867

868 **S5. Fig. Representative images of categories of *A. fumigatus* hyphal growth.** Wild-type

869 larvae were injected with mCherry-expressing TBK5.1 (Af293) spores, exposed to 10  $\mu$ M

870 indomethacin or DMSO vehicle control and imaged at 1, 2, 3, and 5 dpi. Incidences of hyphal

871 growth were scored a value of 1-4 depending on the extent of hyphae. Category 1: presence of

872 one germ tube (white arrow). Category 2: presence of branched hyphae (open white arrow), yet

873 small fungal bolus. Category 3: presence of spread-out invasive hyphae. Category 4: presence of

874 severe invasive hyphae and tissue damage. Scale bars = 50  $\mu$ m or 10  $\mu$ m.

875

876 **S6. Fig. Indomethacin does not significantly impair neutrophil-mediated clearance of *A.***

877 ***fumigatus* hyphae.** Macrophage-deficient *irf8*<sup>-/-</sup> or control (*irf8*<sup>+/+</sup> or *irf8*<sup>+/-</sup>) larvae were injected

878 with *A. fumigatus* TFYL49.1 (CEA10) strain and treated with 10  $\mu$ M indomethacin or DMSO

879 vehicle control. (A) Fungal burden was monitored by homogenizing individual larvae and

880 quantifying CFUs at 1 and 2 dpi. CFUs from *irf8*<sup>-/-</sup> were normalized to CFUs of *irf8*<sup>+/+</sup>/*irf8*<sup>+/-</sup> at

881 each dpi for each condition. Data were pooled from four independent replicates and P values

882 calculated by ANOVA. (B) Larvae were monitored for survival. Data are pooled from five



883 independent replicates and Cox proportional hazard regression analysis was used to calculate P  
884 values and hazard ratios (HR). Average injection CFUs:  $irf8^{+/+}/irf8^{+/-} = 26$ ,  $irf8^{-/-} = 20$ .

885

886 **S7. Fig. PGE<sub>2</sub> injection does not alter phagocyte recruitment or rescue survival of**

887 **neutrophil-defective larvae.** At 2 dpf, larvae were injected with TBK5.1 (Af293), followed by

888 injection of 10 μM PGE<sub>2</sub> or DMSO vehicle control at 3 dpf (1 dpi). The number of (A)

889 macrophages and (B) neutrophils were enumerated at 3 dpi. Data are pooled from three

890 independent replicates, at least 8 larvae per condition, per replicate. Each data point represents an

891 individual larva, color-coded by replicate. Bars represent pooled emmeans ± SEM and P values

892 were calculated by ANOVA. (C) Survival of injected and treated neutrophil-defective larvae

893 (*mpx:rac2D57N*) was monitored. Cox proportional hazard regression analysis was used to

894 calculate P values and hazard ratios (HR). Data are pooled from three replicates, at least 23

895 larvae per condition, per replicate. Average injection CFUs: 49.

896

897 **S1 Table. Primers used to construct *A. fumigatus* Δ*ppo* triple mutant strain.**

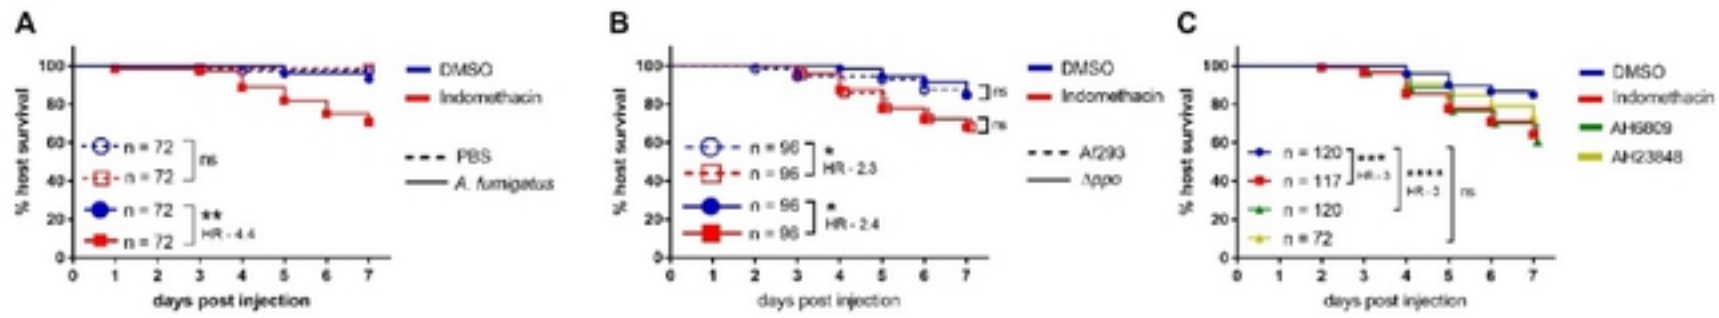

1 **Fig. 1. Host cyclooxygenase signaling promotes survival of *A. fumigatus*-infected larvae. (A)**

2 Survival of wild-type larvae injected at 2 dpf with TBK1.1 (Af293) *A. fumigatus* spores or PBS

3 mock injection in the presence of 10  $\mu$ M indomethacin or DMSO vehicle control. (B) Survival of

4 larvae injected at 2 dpf with *A. fumigatus* Af293 or  $\Delta$ ppo in the presence of 10  $\mu$ M indomethacin or DMSO vehicle control. (C) Survival of larvae injected at 2

5 dpf with TBK1.1 (Af293) spores and exposed to 10  $\mu$ M indomethacin, 5  $\mu$ M AH6809, 10  $\mu$ M

6 AH23848, or DMSO vehicle control. Data are pooled from at least three independent replicates

7 and the total larval N per condition is indicated in each figure. Cox proportional hazard

8 regression analysis was used to calculate P values and hazard ratios (HR). Average injection

9 CFUs: (A) 50, (B) Af293 = 40 and  $\Delta$ ppo = 58, (C) 28.

10

11

12

13

14

15

16

17

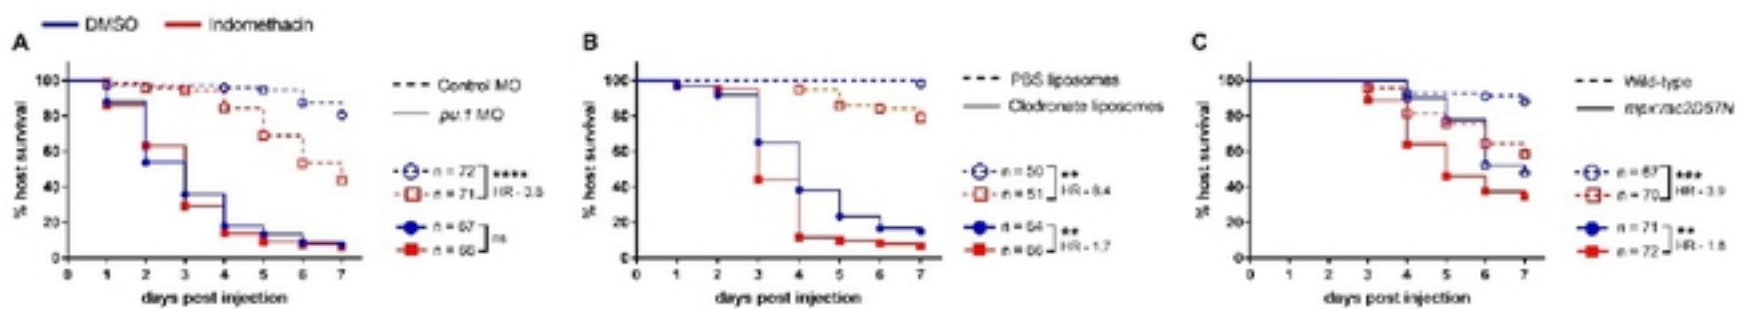

18

19 **Fig. 2. Cyclooxygenase-mediated host protection depends on phagocytes. Survival of larvae**

20 injected with TBK1.1 (Af293) spores at 2 dpf. **(A)** Development of phagocytes was inhibited by  
21 *pu.1* morpholino (MO). Control larvae received standard control MO. **(B)** Macrophages were  
22 depleted via clodronate liposome i.v. injection at 1 dpf. Control larvae received PBS liposomes.  
23 **(C)** Neutrophil-defective larvae (*mpx:rac2D57N*) were compared to wild-type larvae. Data are  
24 pooled from three independent replicates and the total larval N per condition is indicated in each  
25 figure. Cox proportional hazard regression analysis was used to calculate P values and hazard  
26 ratios (HR). Average injection CFUs: (A) control MO = 25, *pu.1* MO = 24, (B) PBS liposomes =  
27 20, clodronate liposomes = 23, (C) wild-type = 26, *mpx:rac2D57N* = 22.

bioRxiv preprint doi: <https://doi.org/10.1101/2021.10.19.464929>; this version posted October 19, 2021. The copyright holder for this preprint (which was not certified by peer review) is the author/funder, who has granted bioRxiv a license to display the preprint in perpetuity. It is made available under aCC-BY 4.0 International license.

28

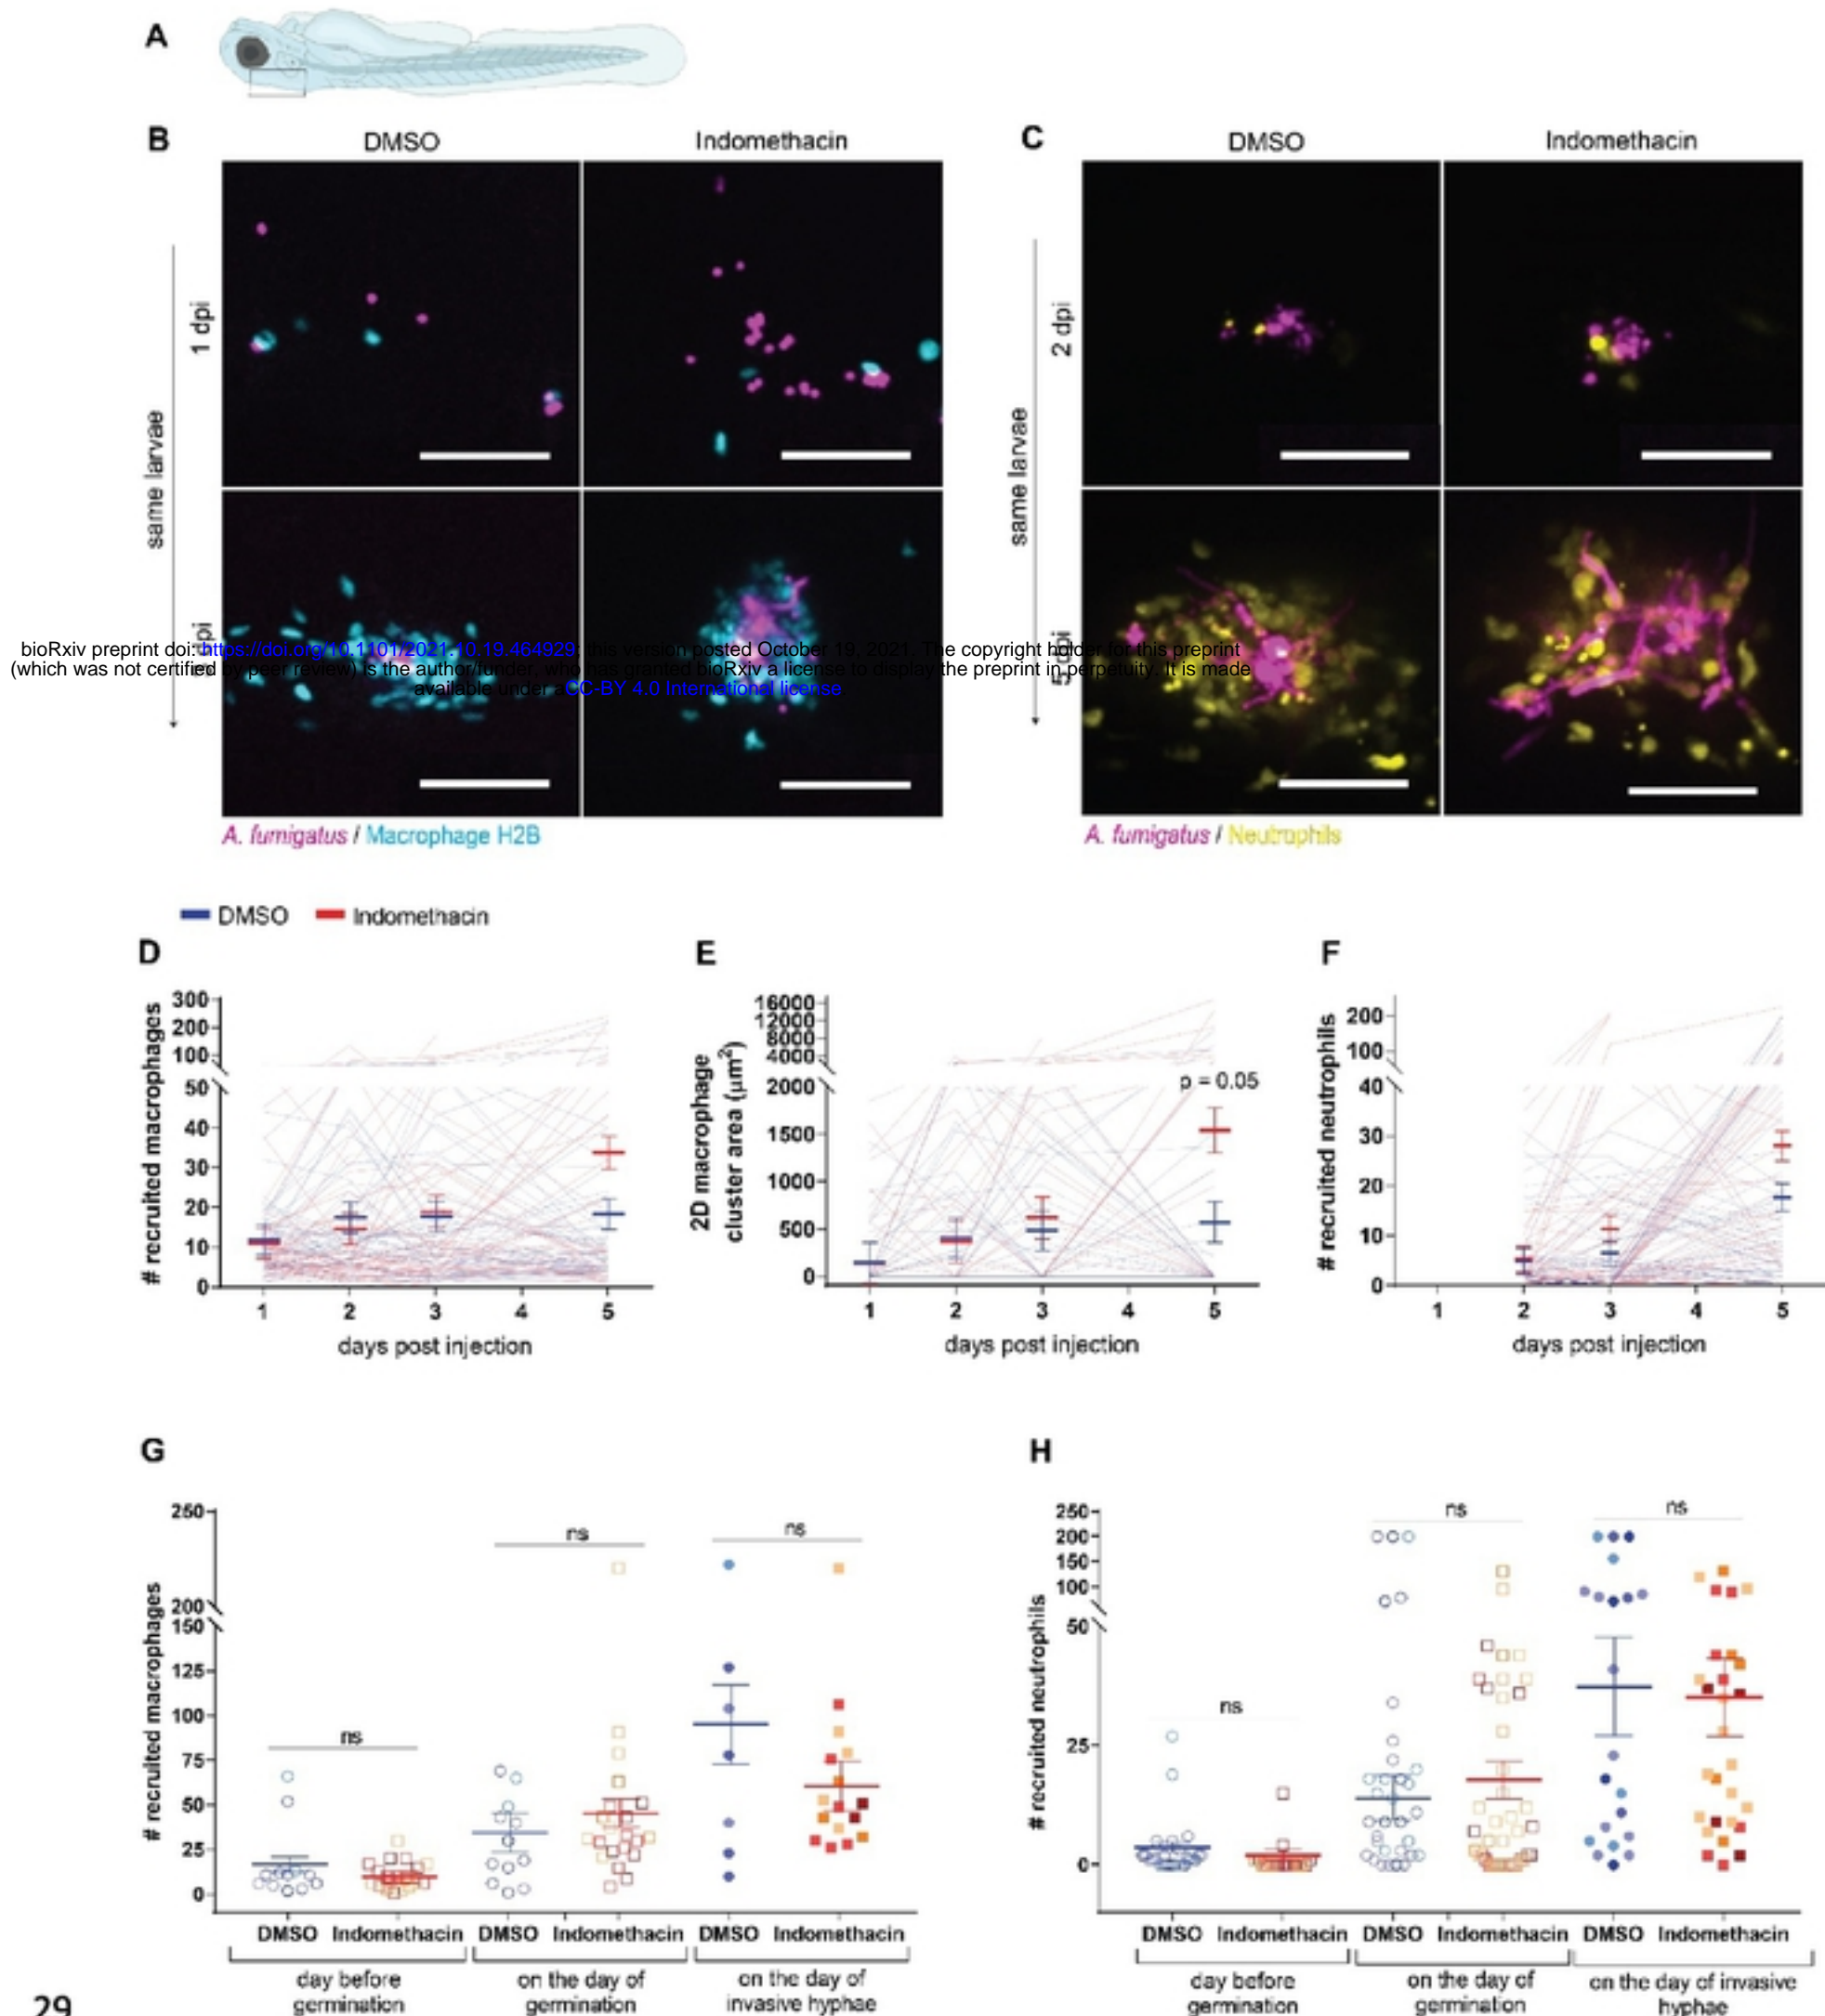

bioRxiv preprint doi: <https://doi.org/10.1101/2021.10.19.464929>; this version posted October 19, 2021. The copyright holder for this preprint (which was not certified by peer review) is the author/funder, who has granted bioRxiv a license to display the preprint in perpetuity. It is made available under aCC-BY 4.0 International license.

29  
 30 **Fig. 3. Cyclooxygenase inhibition does not alter phagocyte recruitment.** Larvae were injected  
 31 with mCherry-expressing *A. fumigatus* TBK5.1 (Af293) spores at 2 dpf. After injection larvae  
 32 were exposed to 10  $\mu\text{M}$  indomethacin or DMSO vehicle control and were imaged through 5 dpi.

33 **(A)** Schematic showing the infection and imaging area of zebrafish larvae. **(B, D, E, G)**  
34 Macrophage nuclear-labeled *Tg(mpeg1:H2B-GFP)* larvae were imaged at 1, 2, 3, and 5 dpi. **(C,**  
35 **F, H)** Neutrophil-labeled *Tg(lyz:BFP)* larvae were imaged at 2, 3, and 5 dpi. **(B, C)**  
36 Representative z-projection images showing macrophage and neutrophil recruitment. Scale bars  
37 = 50  $\mu\text{m}$ . **(D)** Number of macrophages recruited, **(E)** 2D macrophage cluster area, and **(F)**  
38 number of neutrophils recruited were quantified. Each line represents an individual larva  
39 followed for the entire course of infection and bars represent pooled emmeans  $\pm$  SEM from four  
40 independent replicates, at least 12 larvae per condition, per replicate. P values were calculated by  
41 ANOVA. **(G)** Number of macrophages and **(H)** neutrophils one day before germination occurred,  
42 on the day of germination, and on the day invasive hyphae occurred were quantified. Bars  
43 represent pooled emmeans  $\pm$  SEM from all larvae with germination from four independent  
44 replicates. Data points represent individual larva and are color coded by replicate. P values were  
45 calculated by ANOVA.

46

bioRxiv preprint doi: <https://doi.org/10.1101/2021.10.19.464929>; this version posted October 19, 2021. The copyright holder for this preprint (which was not certified by peer review) is the author/funder, who has granted bioRxiv a license to display the preprint in perpetuity. It is made available under aCC-BY 4.0 International license.

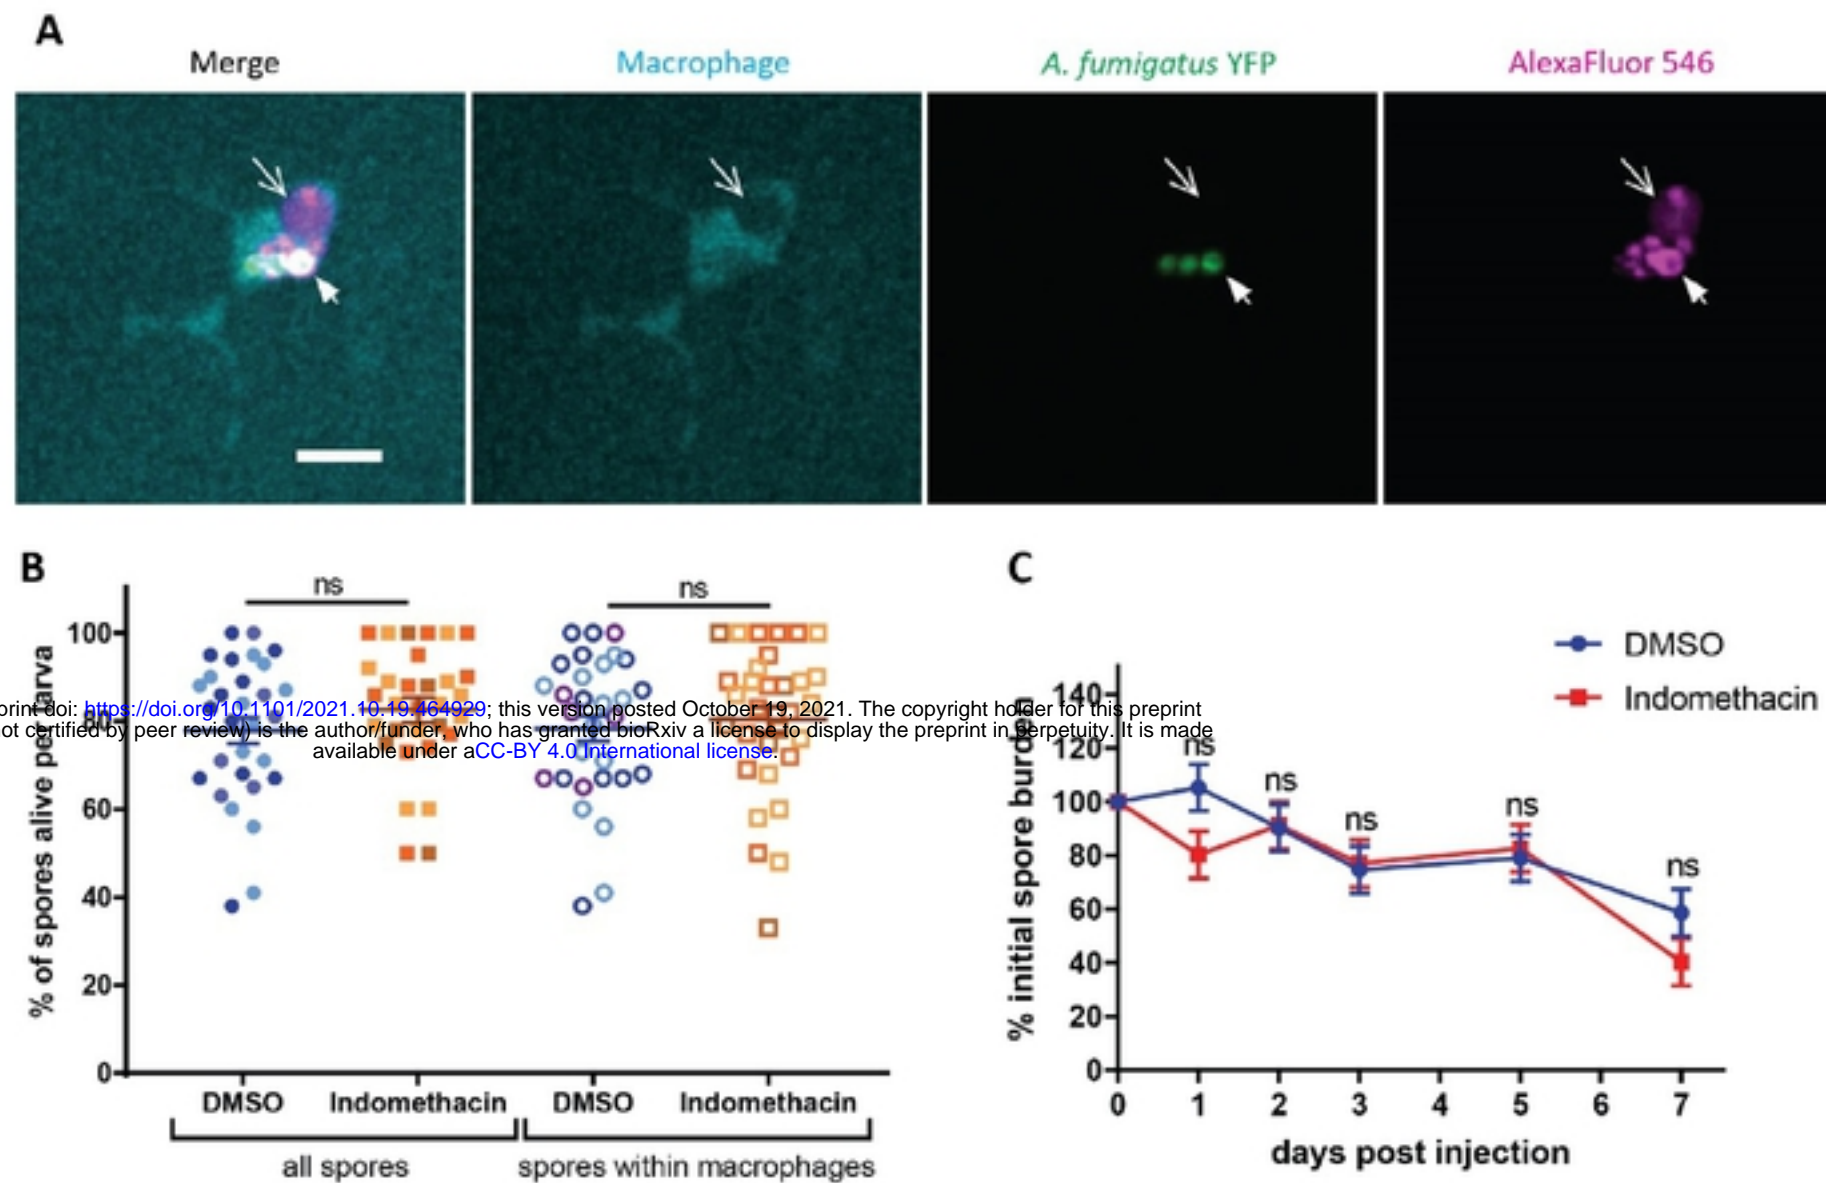

bioRxiv preprint doi: <https://doi.org/10.1101/2021.10.19.464929>; this version posted October 19, 2021. The copyright holder for this preprint (which was not certified by peer review) is the author/funder, who has granted bioRxiv a license to display the preprint in perpetuity. It is made available under aCC-BY 4.0 International license.

47  
 48 **Fig. 4. Cyclooxygenase inhibition does not affect spore killing.** (A, B) Macrophage-labeled  
 49 larvae *Tg(mfap4:mTurquoise2)* were injected with YFP-expressing *A. fumigatus* TBK1.1  
 50 (Af293) spores coated with AlexaFluor 546 at 2 dpf, exposed to 10  $\mu$ M indomethacin or DMSO  
 51 vehicle control, and imaged at 2 dpi. (A) Representative images showing live (white arrow) and  
 52 dead (open arrow) spores within a macrophage. Scale bar = 10  $\mu$ m. Z projection of three slices.  
 53 (B) The percentage of live spores in the hindbrain, and specifically within macrophages, per  
 54 larvae. Each data point represents an individual larvae, color-coded by replicate (indomethacin n  
 55 = 31, DMSO n = 30). Bars represent pooled emmeans  $\pm$  SEM from three independent replicates,  
 56 P values calculated by ANOVA. (C) Wild-type larvae were injected with TBK1.1 (Af293)  
 57 spores at 2 dpf, exposed to 10  $\mu$ M indomethacin or DMSO vehicle control, and fungal burden  
 58 was quantified by homogenizing and plating individual larvae for CFUs at multiple days post  
 59 injection. Eight larvae per condition, per dpi, per replicate were quantified, and the number of

60 CFUs at each dpi is represented as a percentage of the initial spore burden. Bars represent pooled

61 emmeans  $\pm$  SEM from three individual replicates, P values calculated by ANOVA. Average

62 injection CFUs: 27.

63

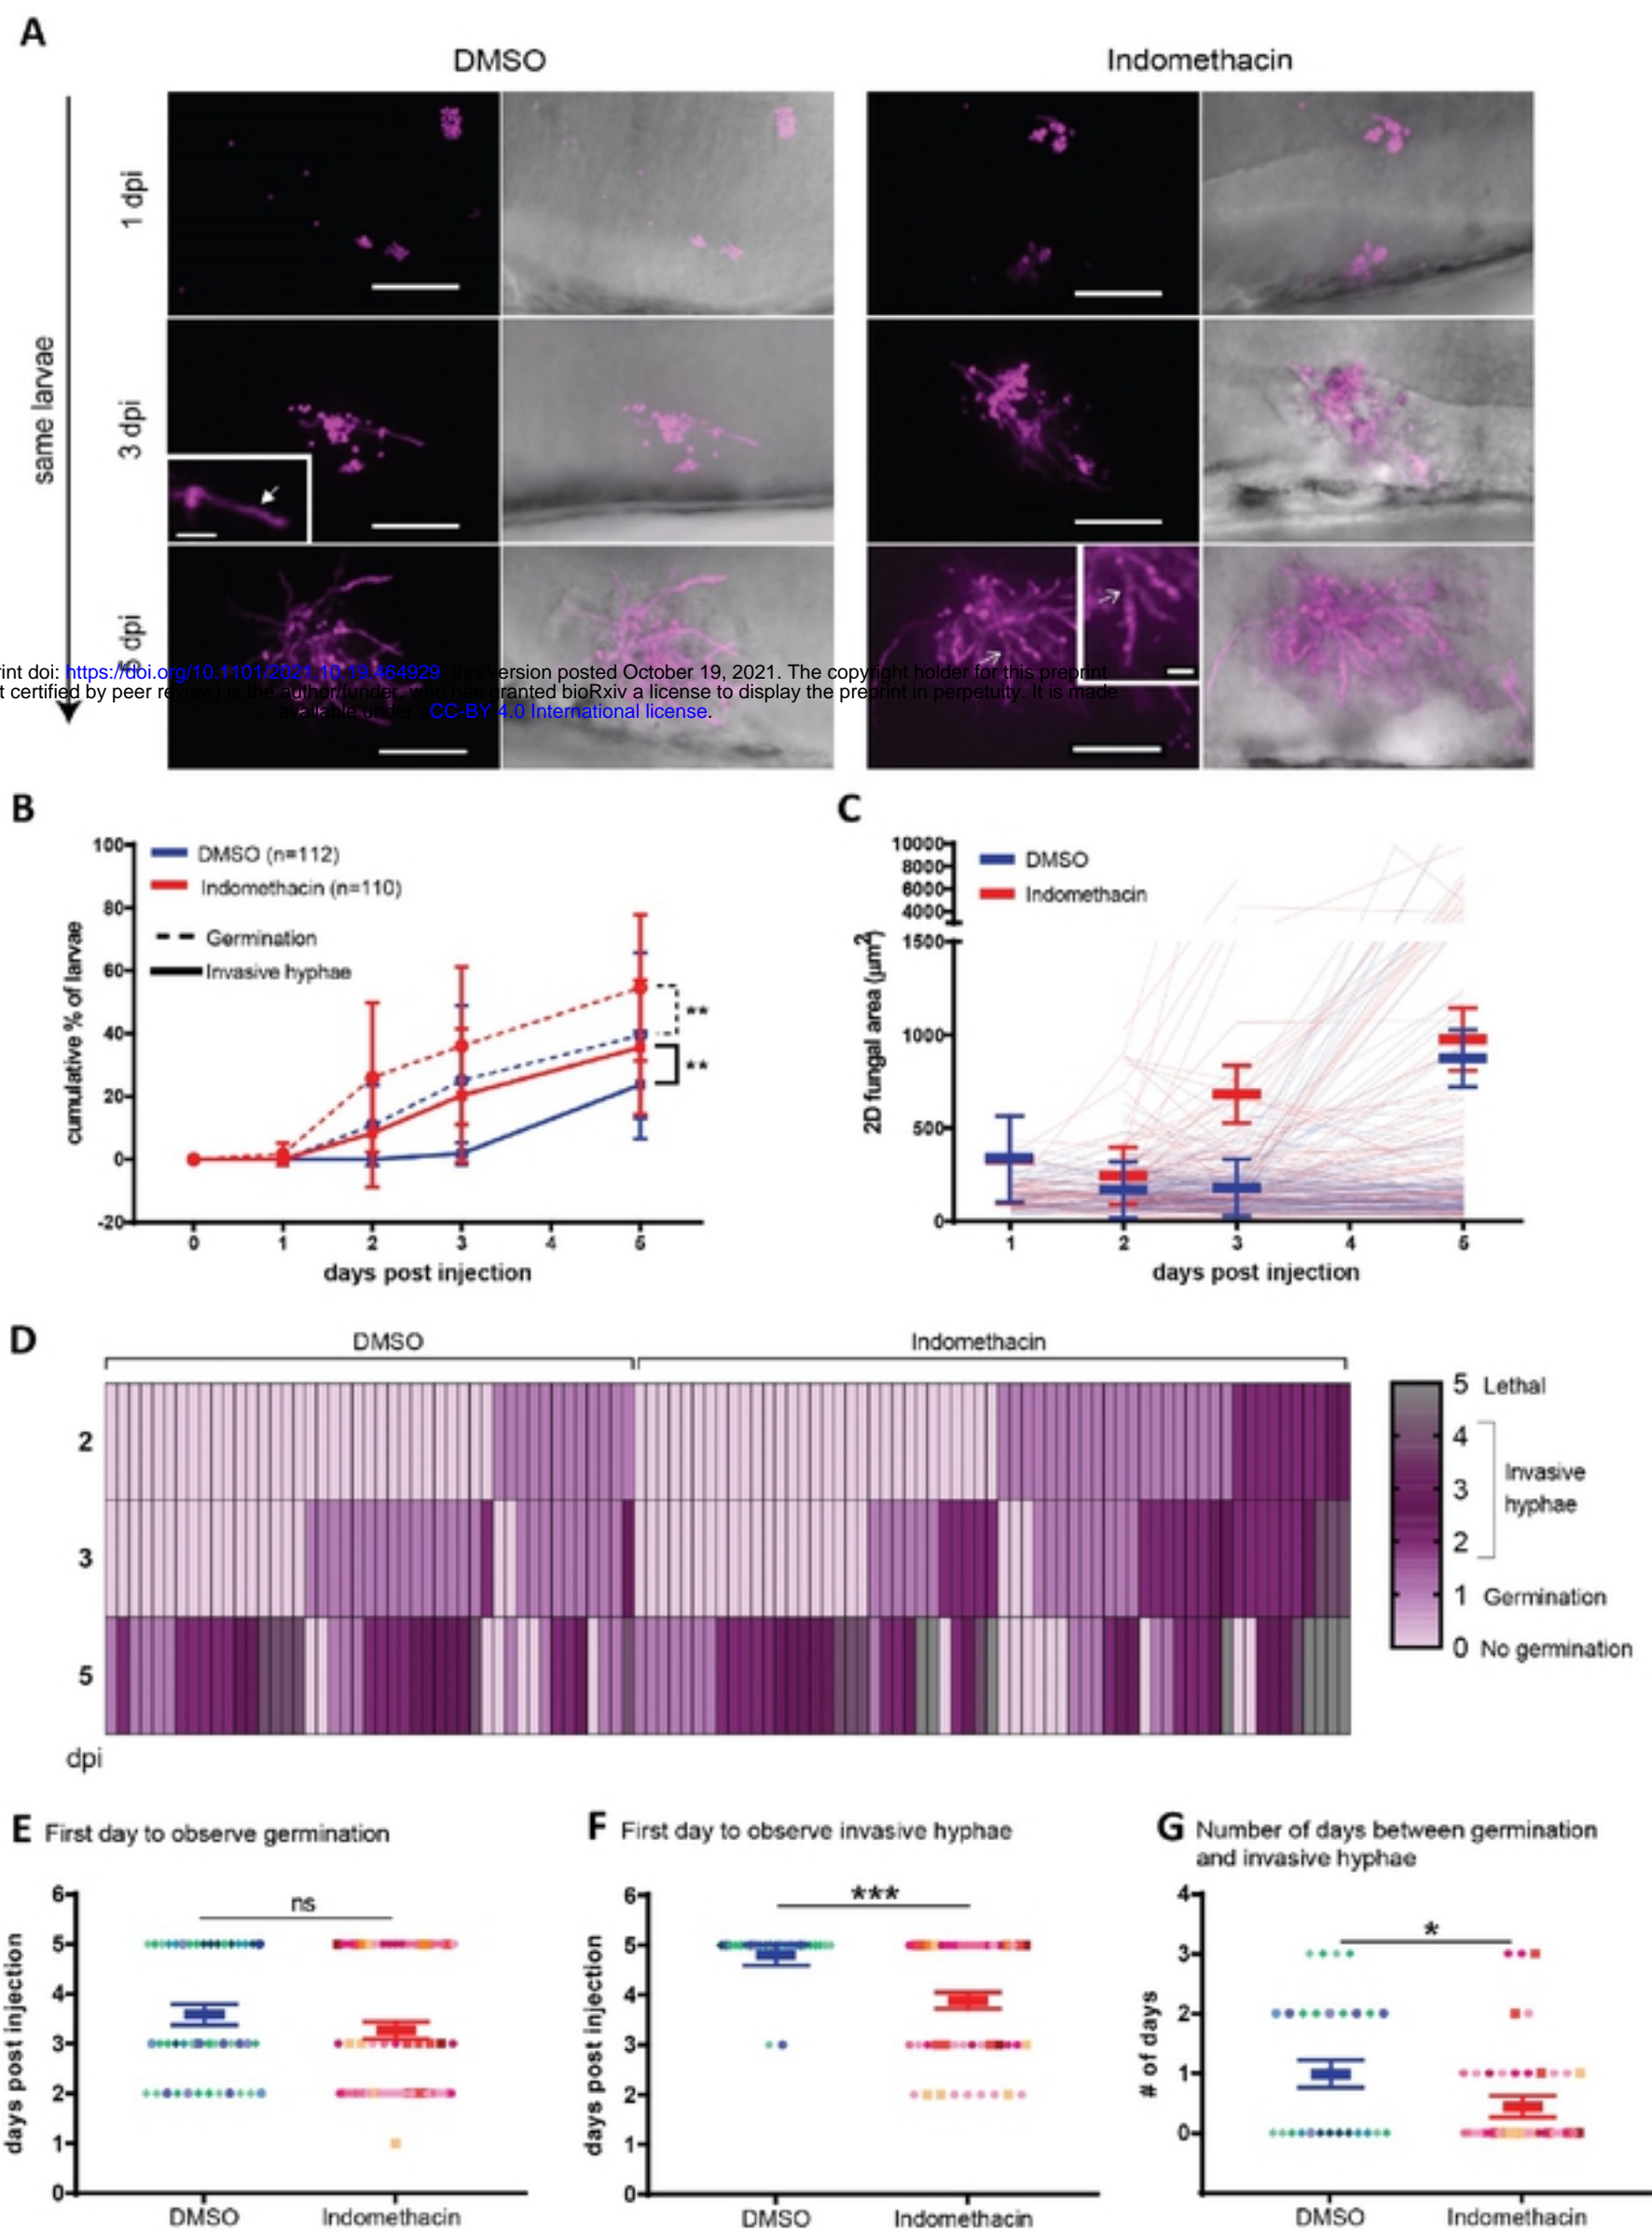

64  
65

**Fig. 5. Cyclooxygenase inhibition decreases immune control of fungal germination and**



66 **invasive hyphal growth.** Zebrafish larvae were injected with mCherry-expressing TBK5.1  
67 (Af293) spores at 2 dpf, exposed to 10  $\mu$ M indomethacin or DMSO vehicle control and imaged  
68 at 1, 2, 3, and 5 dpi. **(A)** Representative images showing spore germination (inset white arrow)  
69 and invasive hyphae (branched hyphae, inset open white arrow). Scale bar = 50  $\mu$ m (10  $\mu$ m in  
70 insets). **(B)** Cumulative percentage of larvae with germination (dotted line) and invasive hyphae  
71 (solid line) through 5 dpi. Cox proportional hazard regression analysis was used to calculate P  
72 values. **(C)** 2D fungal area was quantified from image z projections. Each line represents an  
73 individual larva and bars represent pooled emmeans  $\pm$  SEM from 8 independent replicates, at  
74 least 12 larvae per condition, per replicate. **(D)** Severity of fungal growth was scored for all  
75 larvae and displayed as a heatmap. Representative images for each score can be found in S5 Fig.  
76 **(E-G)** In larvae in which (E) germination (indomethacin n = 61, DMSO n = 45) and (F) invasive  
77 hyphae occurred (indomethacin n = 42, DMSO n = 27), the day on which each was first observed  
78 is plotted. (G) The number of days between germination and invasive hyphae was also  
79 calculated. Bars represent pooled emmeans  $\pm$  SEM from eight individual replicates, P values  
80 calculated by ANOVA. Each data point represents an individual larvae, color-coded by replicate.  
81

bioRxiv preprint doi: <https://doi.org/10.1101/2021.10.19.464929>; this version posted October 19, 2021. The copyright holder for this preprint (which was not certified by peer review) is the author/funder, who has granted bioRxiv a license to display the preprint in perpetuity. It is made available under aCC-BY 4.0 International license.

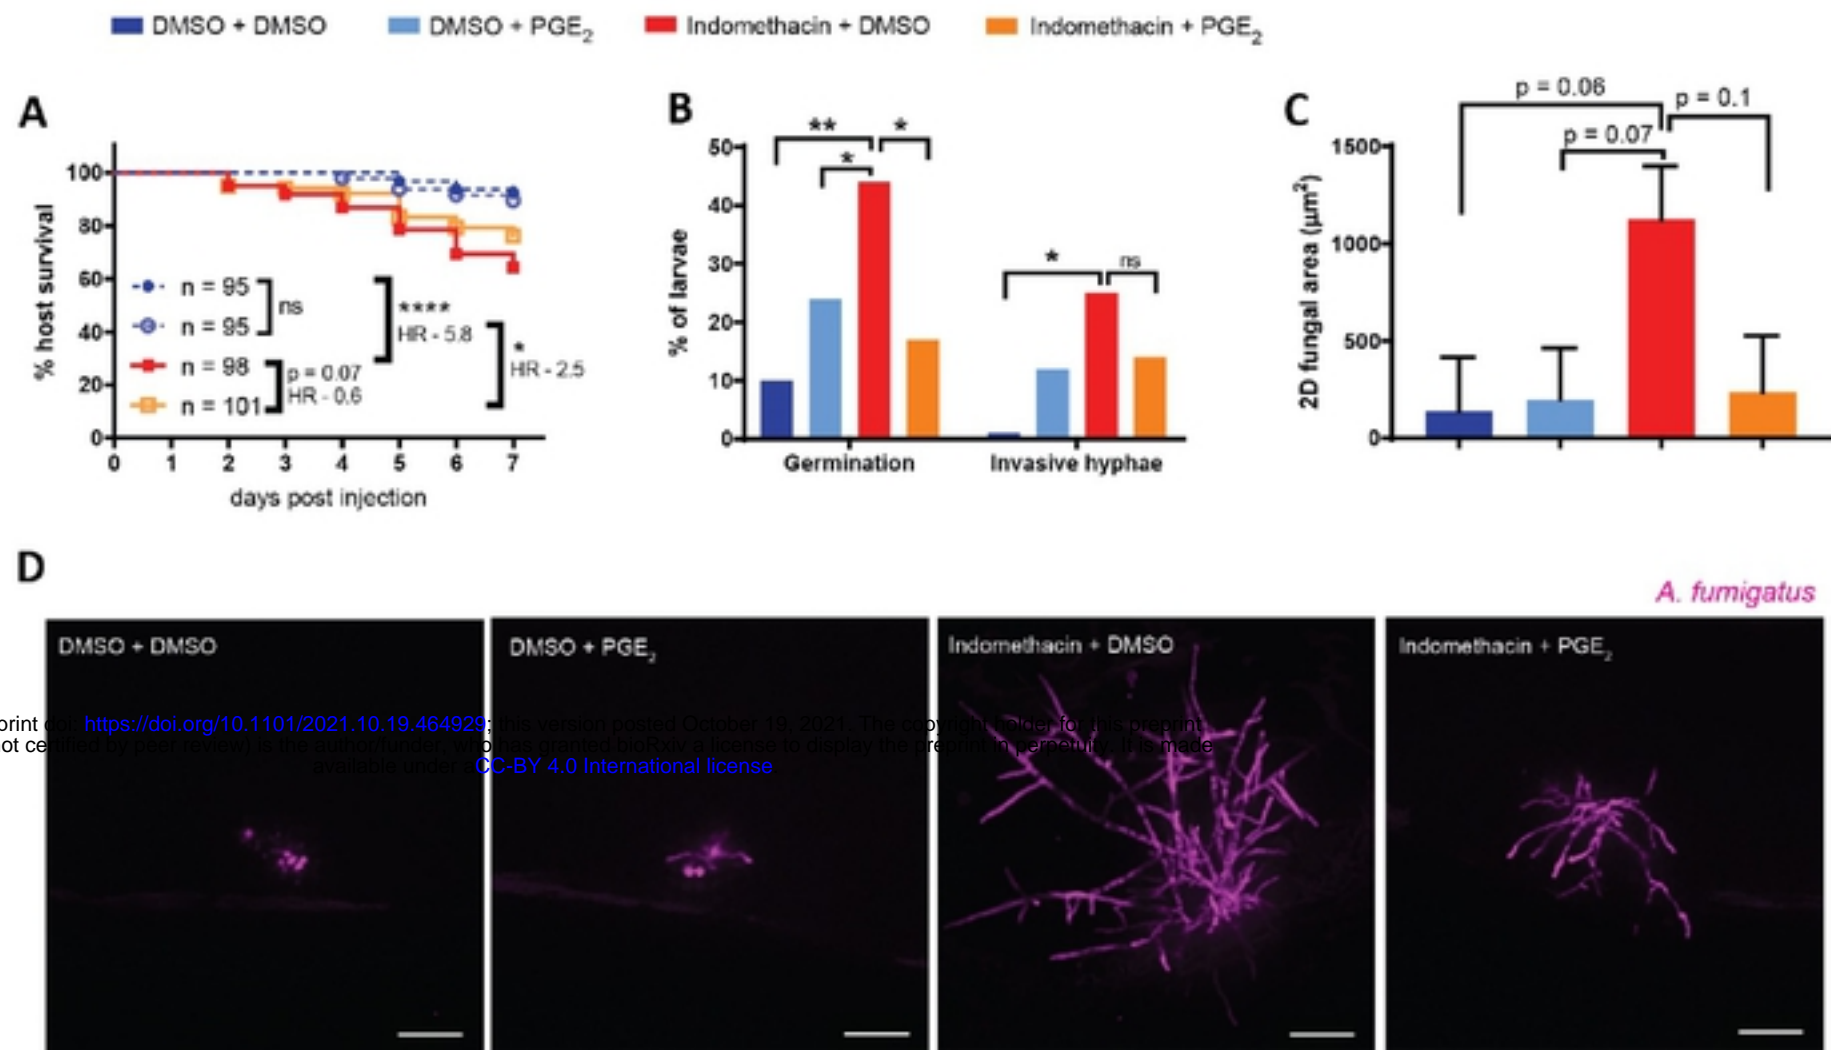

bioRxiv preprint doi: <https://doi.org/10.1101/2021.10.19.464929>; this version posted October 19, 2021. The copyright holder for this preprint (which was not certified by peer review) is the author/funder, who has granted bioRxiv a license to display the preprint in perpetuity. It is made available under aCC-BY 4.0 International license.

82  
83 **Fig. 6. Exogenous PGE<sub>2</sub> can rescue the indomethacin-mediated increase in fungal**  
84 **germination and hyphal growth.** Larvae were injected with mCherry-expressing TBK5.1  
85 (Af293) spores and exposed to 10 μM indomethacin or DMSO vehicle control at 2 dpf. At 1 dpi,  
86 larvae were injected with 10 μM PGE<sub>2</sub> or DMSO vehicle control. **(A)** Survival of wild-type  
87 larvae was monitored. Cox proportional hazard regression analysis was used to calculate P  
88 values and hazard ratios (HR). Data are pooled from four independent replicates, and total larval  
89 N per condition is indicated in figure. Average injection CFUs: 40. **(B-D)** Larvae were imaged at  
90 3 dpi. **(B)** Percentage of larvae with germination and invasive hyphae, and **(C)** 2D fungal area in  
91 each condition. Data pooled from three independent replicates, at least 8 larvae per condition, per  
92 replicate, P values calculated by ANOVA. **(C)** Bars represent pooled emmeans ± SEM. **(D)**  
93 Representative images showing hyphal growth in each condition. Scale bars = 50 μm.

94

bioRxiv preprint doi: <https://doi.org/10.1101/2021.10.19.464929>; this version posted October 19, 2021. The copyright holder for this preprint (which was not certified by peer review) is the author/funder, who has granted bioRxiv a license to display the preprint in perpetuity. It is made available under aCC-BY 4.0 International license.

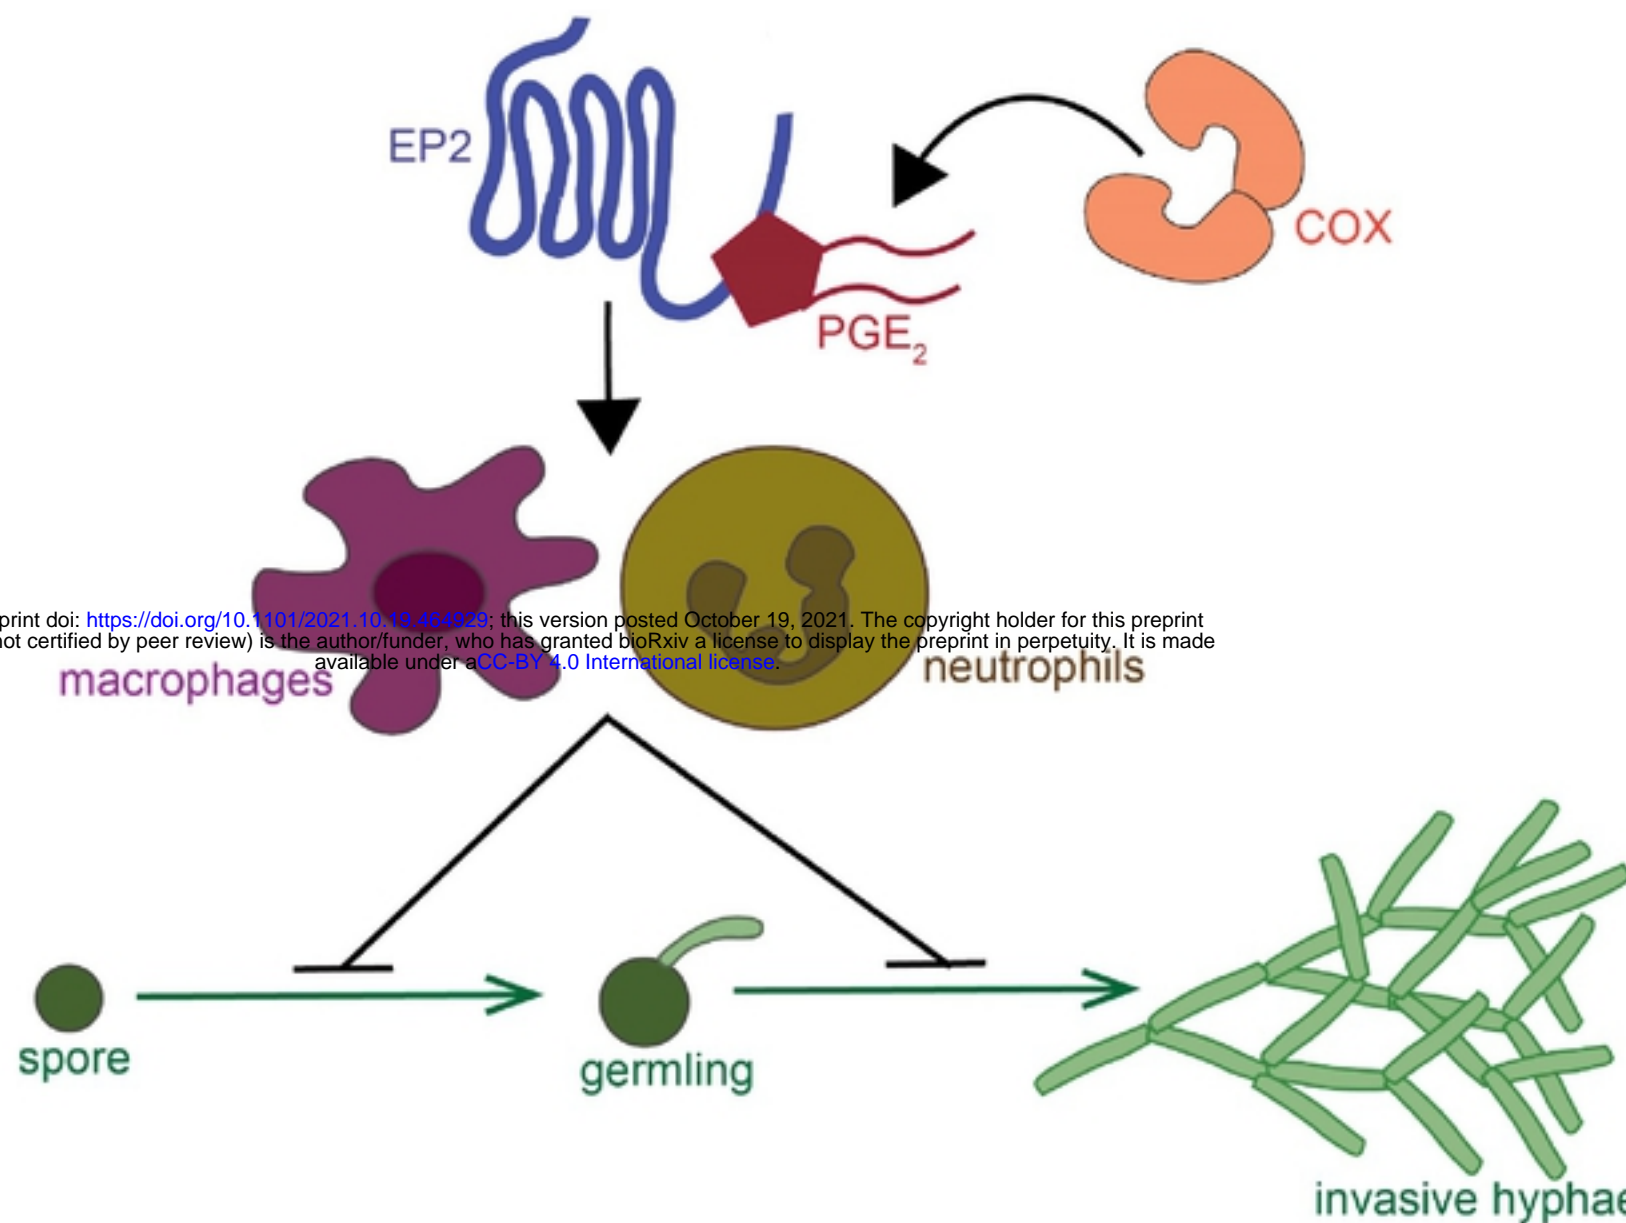

95  
96 **Fig. 7. Model of cyclooxygenase signaling in response to *A. fumigatus* growth.** COX enzymes  
97 produce prostaglandin signaling molecule, including PGE<sub>2</sub>. PGE<sub>2</sub> can bind to the EP2 receptor to  
98 exert pro-inflammatory effects. Zebrafish larvae injected with *A. fumigatus*, this signaling  
99 activates both macrophages and neutrophils to inhibit spore germination and development of  
100 invasive hyphal growth.
